# Supplementary material for: Carbonate- and silicate-metasomatized mantle beneath Himalayan-Tibetan orogenic belt
Source: Research Square preprint supplement (doi:10.21203/rs.3.rs-6729968/v1), 2025-06-02
Supplement: Supplementary file 1 [file 6e043ef4c87757b1a119d83e.xlsx]

## Sheet: Sheet1
Sample	Olivine Type	Fo	Li	Na	Mg	Al	Si	P	K	Ca	Sc	Ti	V	Cr	Mn	Fe	Co	Ni	Cu	Zn	Rb	Sr	Y	Zr	Nb	Cs	Ba	La	Ce	Pr	Nd	Sm	Eu	Gd	Tb	Dy	Ho	Er	Tm	Yb	Lu	Hf	Ta	Tl	Pb	Th	U	Ti/Eu	Mn/Zn
S07_Ol01	Olivine in xenolith	84.5627	12.3319	44.277	272641	329.034	188458	874.481	74.4786	1218.11	7.2123	98.5115	6.4736	231.392	1813.6	104172	135.578	2222.25	24.2425	223.491	1.1052	1.6739	0.49	5.2976	0.1441	0.1711	2.3064	0.0985	0.0854	0.02	0.0435	0.0489	0.0058	0.0218	0.0066	0.0267	0.0004	0.0936	0.0116	0.1092	0.0116	0.1439	0.0165	0.0478	1.8732	1.3407	0.0412	16984.7	8.11487
S07_Ol02	Olivine in xenolith	85.1016	11.6466	25.6767	277733	182.629	182445	553.432	40.8664	855.416	6.376	84.7305	6.1543	244.506	1870.67	109238	124.344	1806.53	23.9512	198.191	0.8159	1.277	0.4628	1.777	1.2182	0.1723	3.0649	0.2476	0.119	0.0037	0.2601	0.0239	0.0022	0.0068	0.003	0.0029	0.0383	0.1113	0.0349	0.1599	0.0343	0.0095	0.038	0.0592	1.0738	0.5409	0.001	38513.9	9.43873
S07_Ol03	Olivine in xenolith	84.6347	12.7205	71.6569	273715	585.1	186800	877.078	205.544	1544.57	7.1689	127.925	8.2208	345.589	1819.7	104695	129.48	2005.3	17.2533	222.313	2.8974	4.8133	0.4619	6.6589	0.3671	0.2181	7.4351	0.2828	0.6643	0.0696	0.284	0.0207	0.0173	0.0417	0.006	0.0614	0.0249	0.0359	0.0085	0.1741	0.0376	0.1502	0.1016	0.097	2.0303	1.9804	0.1178	7394.51	8.18529
S07_Ol04	Olivine in xenolith	84.6347	12.1276	85.6163	232516	327.942	209394	1708.08	284.331	1844.31	7.34	128.307	7.8783	271.986	1737.07	117905	177.504	2826.72	36.5411	321.257	4.4874	3.1192	0.6639	7.1563	0.2833	0.75	4.0342	0.2579	0.535	0.0366	0.2044	0.0432	0.011	0.0412	0.0007	0.0243	0.0126	0.0568	0.0245	0.2297	0.0306	0.1497	0.0346	0.1411	5.3808	2.7044	0.0924	11664.2	5.4071
S07_Ol05	Olivine in xenolith	84.1945	11.967	52.4022	253737	285.632	196773	1303.54	85.3538	956.837	8.1415	89.0557	8.2631	271.273	1795.58	113963	151.983	2460.95	21.8207	274.078	1.3131	1.3966	0.4752	3.6819	0.1302	0.2024	2.6392	0.0668	0.1746	0.0231	0.0796	0.052	0.0034	0.0391	0.0044	0.0277	0.0142	0.0636	0.0098	0.1092	0.0328	0.1255	0.0162	0.0644	1.5945	0.9315	0.0607	26192.9	6.55136
S07_Ol06	Olivine in xenolith	86.7222	12.961	87.6778	282802	919.557	185116	1070.08	268.336	1670.83	8.818	179.372	11.3787	783.388	1671.17	94029.5	128.443	2306.16	24.2424	197.157	3.9191	5.3936	0.4881	8.5347	0.3918	0.4827	9.6834	0.2939	1.1471	0.067	0.2666	0.0524	0.0121	0.0775	0.0079	0.0443	0.0244	0.0709	0.0119	0.1033	0.0271	0.2839	0.0306	0.13	1.8951	1.8048	0.2282	14824.1	8.47636
S07_Ol07	Olivine in xenolith	85.8466	12.8028	56.5063	287920	553.022	181429	963.696	195.588	1327.74	7.9544	179.48	11.906	1021.58	1663.19	94558.1	130.831	2253.63	57.2798	173.351	3.7504	3.131	0.6881	6.1975	0.1759	0.5235	4.9471	0.2943	0.5991	0.0479	0.2653	0.0529	0.0044	0.0327	0.0144	0.0571	0.0219	0.0994	0.0112	0.1344	0.0234	0.1723	0.0323	0.1031	1.2546	1.0942	0.0772	40790.8	9.59435
S05_Ol01	Olivine in xenolith	83.9299	10.4416	54.4541	243726	393.687	201004	1094.46	91.2907	1196.26	7.6959	97.4753	6.8599	197.206	1812.58	119223	173.303	3042.06	27.6366	286.074	1.3228	1.9498	0.3891	5.4559	0.1682	0.2429	1.7307	0.0276	0.1231	0.0147	0.0615	0.0186	0.0053	0.0417	0.0093	0.0376	0.0058	0.0856	0.0242	0.0969	0.027	0.1468	0.0306	0.0379	0.9209	0.6304	0.0529	18391.6	6.33605
S05_Ol03	Olivine in xenolith	84.6674	10.7971	34.1305	265441	91.2351	190710	751.879	14.0184	819.374	6.6757	51.2531	6.5148	245.79	1844.63	110394	152.323	2614.46	5.4962	245.728	0.2427	0.1458	0.3612	0.3645	0.0091	0.0372	1.5856	0.0077	0.0186	0.009	0.0245	0.0417	0.0064	0.0106	0.0093	0.0684	0.0112	0.0271	0.0051	0.0411	0.0256	0.0112	0.0016	0.0238	0.0696	0.0771	0.0046	8008.3	7.5068
S05_Ol04	Olivine in xenolith	83.7938	11.2759	40.15	271486	299.078	186226	754.085	83.7998	1148.75	7.5481	95.3574	7.4016	237.457	1871.91	109425	141.052	2432.2	20.0302	233.058	1.1826	1.9057	0.3684	3.124	0.1362	0.1856	2.6017	0.0934	0.2375	0.0309	0.0639	0.0026	0.0185	0.033	0.0097	0.0292	0.0123	0.0961	0.0068	0.1187	0.0256	0.0558	0.0076	0.033	1.4529	1.2422	0.0539	5154.45	8.03198
S-1_ Ol1	Phenocryst of host rock	74.375	10.0198	37.8963	262007	89.8408	184976	712.672	3.8773	1048.69	4.6552	72.5219	4.974	231.395	2030.21	124786	162.684	1726.95	4.8919	322.76	0.1195	0.1678	0.2698	0.4522	0.0215	0.0131	0.237	0.01	0.0316	0.003	0.0321	0.0055	0.0031	0.0272	0.0035	0.0266	0.0105	0.0414	0.0084	0.072	0.0166	0.0202	0.0007	0.0066	0.3157	0.0853	0.0018	23394.2	6.29015
S-1_ Ol2	Phenocryst of host rock	74.9001	9.2855	40.9429	271060	123.406	187213	732.403	9.2818	933.435	4.1928	76.7505	4.7544	221.255	1767.14	109655	165.122	1815.24	5.0824	277.528	0.159	0.4846	0.1889	1.2389	0.0754	0.0442	0.4285	0.0144	0.0427	0.005	0.0251	0.0155	0.0021	0.017	0.0043	0.0133	0.0088	0.019	0.0052	0.0353	0.0119	0.0355	0.0007	0.0097	0.2877	0.2523	0.0088	36547.9	6.36744
S-1_ Ol3	Phenocryst of host rock	75.0219	9.0444	40.8472	277788	116.076	186815	691.832	10.2205	971.569	4.1912	76.9241	4.7835	210.914	1626.71	101844	169.435	1843.67	4.9371	237.819	0.1712	0.3484	0.1764	1.1066	0.0655	0.0376	0.3318	0.0201	0.0404	0.0044	0.0217	0.0085	0.0007	0.0287	0.0015	0.0216	0.0042	0.0224	0.0063	0.0531	0.0059	0.0219	0.0021	0.0064	0.2765	0.2693	0.0094	109892	6.84013
S-1_ Ol4	Phenocryst of host rock	74.5455	8.5371	41.8299	277675	81.119	187135	769.675	1.1203	939.004	4.1584	74.1397	4.5272	209.549	1571.83	101388	171.213	1919.51	3.738	252.289	0.022	0.0692	0.1844	0.2515	0.0233	0.0097	0.0686	0.0055	0.0185	0.0029	0.0193	0.0054	0.0022	0.0202	0.0034	0.0116	0.0048	0.0138	0.004	0.0297	0.012	0.005	0.0002	0.0075	0.0553	0.0119	0.0005	33699.9	6.23027
S-1_ Ol5	Phenocryst of host rock	75.1914	8.912	38.3795	270559	74.7549	186210	660.187	1.1085	915.687	4.4011	71.9377	5.0989	195.868	1788.07	112162	170.302	1865.12	3.9183	278.375	0.0288	0.084	0.2146	0.2134	0.003	0.0103	0.0728	0.0048	0.0142	0.0039	0.0073	0.0086	0.0007	0.0259	0.0042	0.0201	0.0091	0.0291	0.0064	0.0555	0.0105	0.0077	0.0002	0.0076	0.0891	0.0031	0.0002	102768	6.42324

## Sheet: Precision_ppm of trace element
Sample	Li7	Na23	Mg24	Al27	Si29	P31	K39	Ca43	Sc45	Ti49	V51	Cr53	Mn55	Fe57	Co59	Ni62	Cu63	Zn66	Rb85	Sr88	Y89	Zr90	Nb93	Cs133	Ba137	La139	Ce140	Pr141	Nd146	Sm147	Eu153	Gd157	Tb159	Dy163	Ho165	Er166	Tm169	Yb172	Lu175	Hf178	Ta181	Tl205	Pb208	Th232	U238
S07_Ol01	0.3295	1.9054	3538.66	36.5581	55.8951	26.6123	8.5648	124.979	0.3879	7.0091	0.2663	4.7145	17.0447	2130.57	1.4989	59.5703	2.2934	7.2624	0.1796	0.2702	0.0603	0.8219	0.0354	0.034	0.4585	0.0247	0.023	0.0092	0.0442	0.0343	0.0065	0.0243	0.0046	0.0186	0	0.0319	0.0065	0.0336	0.0052	0.0411	0.0063	0.0176	0.2573	0.1459	0.0146
S07_Ol02	0.1172	0.8879	1473.58	0.3468	113.013	43.7182	1.6838	116.425	1.1787	7.2908	0.809	14.622	12.1536	2464.85	1.0882	42.9812	1.2845	6.7199	0.0532	0.072	0.1425	0.0072	0.0045	0.0323	0.0181	0.0012	0.0018	0	0.002	0	0	0	0	0	0.0004	0.0031	0.0003	0.0015	0.0009	0	0.001	0.0001	0.0095	0.0012	0
S07_Ol03	0.3764	13.0438	3621.24	79.151	50.9126	21.2653	53.7311	173.672	0.2255	9.3141	0.3492	42.3072	16.9725	2004.41	1.0188	50.9724	0.6055	5.4806	0.5703	0.7071	0.0489	0.7481	0.0602	0.0356	1.5132	0.0566	0.223	0.0269	0.0925	0.0225	0.0092	0.0287	0.0041	0.0221	0.0098	0.0155	0.0059	0.0514	0.0117	0.0329	0.0586	0.0278	0.1511	0.1902	0.0197
S07_Ol04	0.6408	6.9579	3083.81	23.4419	124.673	123.353	22.5167	168.803	0.4536	8.7817	0.4074	23.3941	23.3081	2343.93	2.2325	83.3063	2.0939	9.488	0.3725	0.365	0.0759	1.3655	0.0696	0.0981	0.9063	0.0477	0.0808	0.0184	0.102	0.0494	0.0128	0.0456	0	0.0258	0.0091	0.0314	0.011	0.0819	0.0193	0.0545	0.0163	0.0511	0.3357	0.3343	0.0313
S07_Ol05	0.2739	2.4142	4156.68	10.9645	53.5138	24.5567	6.3712	92.6527	0.2482	3.4805	0.3154	20.3381	21.5744	2168.51	1.9222	68.5273	1.1807	5.6353	0.1112	0.0982	0.0328	0.2284	0.0241	0.0257	0.3365	0.0132	0.0323	0.0068	0.0288	0.0231	0.0045	0.02	0.003	0.0145	0.0042	0.017	0.0036	0.0258	0.0065	0.0231	0.0051	0.0131	0.1867	0.0873	0.0101
S07_Ol06	0.2274	5.997	2635.87	89.2936	23.3658	18.6371	24.0272	138.885	0.2694	9.1812	0.8555	81.9883	13.1119	1851.63	1.7876	47.8091	0.948	6.1485	0.682	0.3678	0.0345	0.3423	0.0446	0.0464	1.3559	0.0393	0.159	0.0104	0.0545	0.0281	0.0065	0.0291	0.0036	0.0136	0.0067	0.0233	0.0053	0.0205	0.0088	0.0422	0.0066	0.0267	0.1497	0.0914	0.0355
S07_Ol07	0.6262	3.1175	3069.51	31.7658	23.908	14.5344	17.1178	96.908	0.481	16.1174	1.5611	265.771	15.9976	1764.16	1.8325	52.8256	1.9305	6.1293	0.3254	0.2585	0.0337	0.4132	0.0313	0.0655	0.6911	0.027	0.0827	0.0091	0.0789	0.0236	0.0043	0.0202	0.004	0.0168	0.0045	0.0284	0.0083	0.037	0.006	0.0209	0.0088	0.0167	0.092	0.0712	0.0156
S05_Ol01	0.4557	4.9363	3366.04	13.5397	64.7781	71.0894	2.9409	136.493	0.3601	5.9117	0.4689	10.0391	21.8318	2449.2	2.4835	69.9056	0.9375	6.441	0.1319	0.2059	0.0365	0.3324	0.0419	0.0351	0.2708	0.0108	0.0413	0.0072	0.0352	0.0245	0	0.0322	0.0054	0.0216	0.0046	0.0276	0.0074	0.0516	0.0076	0.034	0.0107	0.017	0.1432	0.0711	0.0126
S05_Ol03	0.3602	1.5646	3137.9	2.4172	48.8121	21.4992	6.276	93.5596	0.2426	2.3744	0.268	6.7798	16.1051	2086.26	1.6566	60.5064	0.3774	3.8286	0.0863	0.0765	0.0415	0.0572	0.0075	0.0131	0.6599	0.005	0.0101	0.0064	0.0183	0.0333	0.0053	0.0155	0.0047	0.0215	0.0044	0.0147	0.003	0.018	0.0078	0.0091	0.0024	0.0103	0.0185	0.0241	0.0036
S05_Ol04	0.4284	1.7123	4087.12	33.0514	47.0091	16.8861	10.3012	113.543	0.2056	5.0014	0.2167	11.7215	18.5513	2256.79	1.6091	61.0023	2.1019	5.1905	0.1245	0.2991	0.0526	0.3941	0.029	0.0345	0.5124	0.021	0.1449	0.0091	0.038	0.0001	0.0109	0.0241	0.0045	0.0162	0.0049	0.0309	0.0038	0.0389	0.0061	0.0238	0.0043	0.0154	0.2326	0.2021	0.0113
S-1_ Ol1	0.3029	8.7248	3771.72	18.1198	47.2516	18.034	30.5	81.7593	0.4181	8.3685	0.398	5.1946	17.6922	2182.08	1.7464	54.245	0.823	4.7026	0.6504	0.1627	0.0503	0.4244	0.0522	0.0258	0.5957	0.0457	0.1185	0.015	0.1518	0.0214	0.0057	0.0288	0.0055	0.0258	0.0074	0.0304	0.0052	0.0485	0.0074	0.0309	0.0053	0.018	0.0808	0.2029	0.0173
S-1_ Ol2	0.1929	0.6626	2083.16	2.7647	16.5466	11.8197	0.8966	54.5632	0.1279	2.1687	0.122	4.3681	24.0954	2440.79	1.1543	37.1831	0.1708	3.6117	0.0225	0.035	0.0172	0.0657	0.0077	0.0072	0.0523	0.0042	0.0085	0.0015	0.0118	0.0046	0.0018	0.0091	0.0013	0.0065	0.0022	0.007	0.0022	0.0118	0.0029	0.0059	0.0008	0.0023	0.0537	0.0252	0.001
S-1_ Ol3	0.1838	0.7847	2428.74	6.6808	16.6808	15.5789	1.1929	47.9008	0.0886	2.0825	0.1215	3.2708	10.8799	1911.25	1.2643	39.1133	0.3204	2.9822	0.0256	0.0537	0.0122	0.1446	0.0136	0.0069	0.0559	0.0046	0.0087	0.0016	0.0077	0.0058	0.0008	0.0104	0.0009	0.0066	0.0015	0.0054	0.0016	0.0119	0.0016	0.0076	0.0012	0.0025	0.0397	0.0502	0.0025
S-1_ Ol4	0.1561	0.6348	2701.4	0.8282	16.2655	14.7189	0.3415	53.2218	0.1001	1.991	0.0941	3.8951	11.0454	1932.57	1.2965	41.9269	0.1415	4.0204	0.0097	0.0103	0.0175	0.0226	0.005	0.0041	0.0221	0.0021	0.0039	0.0016	0.0086	0.005	0.0015	0.0081	0.0012	0.0045	0.0017	0.0048	0.0016	0.0073	0.0025	0.003	0.0018	0	0.0129	0.0027	0.0005
S-1_ Ol5	0.136	0.636	2522.16	0.7229	17.4391	18.3219	0.1642	42.092	0.0951	1.7102	0.1065	3.0773	18.0654	2099.27	1.131	39.6959	0.1753	3.022	0.0117	0.0117	0.014	0.0179	0.002	0.0049	0.026	0.0023	0.0034	0.0016	0.0052	0.0059	0.0011	0.0087	0.0013	0.0062	0.0021	0.0064	0.0017	0.0101	0.0021	0.0034	0.0005	0.0025	0.0137	0.0015	0.0008
