# Supplementary material for: Carbonate- and silicate-metasomatized mantle beneath Himalayan-Tibetan orogenic belt
Source: Research Square preprint supplement (doi:10.21203/rs.3.rs-6729968/v1), 2025-06-02
Supplement: Supplementary file 2 [file d162c926fd2d8618316ac5c7.xlsx]

## Sheet: Sheet1
Sample No.	C01-1	C01-2	C01-3	C01-4	C01-5	C01-6	C01-7	C01-8	C01-9	C01-10	C01-11	C01-12	C02-1	C02-2	C02-3	C02-4	C02-5	C02-6	C03-1	C03-2	C03-3	C03-4	C03-5	C03-6	C04-1	C04-2	C04-3	C04-4	C05-1	C05-2	C05-3	C05-4	C05-5	S01B1-1	S01B1-2	S01B1-3	S01B1-4	S01B2-1	S01B2-2	S01B2-3	S01B2-4	S01B2-5	S01B3-1	S01B3-2	S01B3-3	S01B3-4	S01B3-5	S01B4-1	S01B4-2
Core/rim	core	core	core	core	core	rim	rim	core	core	core	rim	core	core	core	core	core	core	core	rim	rim	core	core	core	core	core	core	core	core	rim	rim	core	rim	rim	rim	core	rim	core	rim	core	core	core	core	rim	core	rim	core	rim	core	rim
Vein/pocket-Cpx contacts	Connect with silicate pocket	Connect with silicate pocket	Not in connect with silicate pocket	Not in connect with silicate pocket	Not in connect with silicate pocket	Not in connect with silicate pocket	Connect with silicate pocket	Connect with silicate pocket	Not in connect with silicate pocket	Not in connect with silicate pocket	Connect with silicate pocket	Connect with silicate pocket	Not in connect with silicate pocket	Not in connect with silicate pocket	Not in connect with silicate pocket	Connect with silicate pocket	Connect with silicate pocket	Connect with silicate pocket	Not in connect with silicate pocket	Not in connect with silicate pocket	Not in connect with silicate pocket	Connect with silicate pocket	Connect with silicate pocket	Connect with silicate pocket	-	-	-	-	-	-	-	-	-	-	-	-	-	-	-	-	-	-	-	-	-	-	-	-	-
Rock Type	OPG-Type II Websterite	OPG-Type II Websterite	OPG-Type II Websterite	OPG-Type II Websterite	OPG-Type II Websterite	OPG-Type II Websterite	OPG-Type II Websterite	OPG-Type II Websterite	OPG-Type II Websterite	OPG-Type II Websterite	OPG-Type II Websterite	OPG-Type II Websterite	OPG-Type II Websterite	OPG-Type II Websterite	OPG-Type II Websterite	OPG-Type II Websterite	OPG-Type II Websterite	OPG-Type II Websterite	OPG-Type II Websterite	OPG-Type II Websterite	OPG-Type II Websterite	OPG-Type II Websterite	OPG-Type II Websterite	OPG-Type II Websterite	OPG-Type I Websterite	OPG-Type I Websterite	OPG-Type I Websterite	OPG-Type I Websterite	OPG-Type I Websterite	OPG-Type I Websterite	OPG-Type I Websterite	OPG-Type I Websterite	OPG-Type I Websterite	ORG-Lherzolite	ORG-Lherzolite	ORG-Lherzolite	ORG-Lherzolite	ORG-Lherzolite	ORG-Lherzolite	ORG-Lherzolite	ORG-Lherzolite	ORG-Lherzolite	ORG-Lherzolite	ORG-Lherzolite	ORG-Lherzolite	ORG-Lherzolite	ORG-Lherzolite	ORG-Lherzolite	ORG-Lherzolite
Major elements
SiO2	50.565	50.352	51.048	50.906	51.505	51.649	50.134	51.137	51.024	50.579	50.475	51.435	51.257	50.973	50.973	51.368	50.885	51.282	50.834	50.834	52.186	50.718	50.718	50.718	52.696	52.778	52.361	52.258	51.854	52.671	51.284	51.486	51.486	56.114	54.973	53.847	55.524	54.862	55.983	55.169	56.056	56.028	54.862	55.213	54.171	56.404	56.303	55.905	56.77
TiO2	0.422	0.363	0.316	0.421	0.269	0.28	0.327	0.339	0.292	0.315	0.373	0.373	0.638	0.646	0.644	0.651	0.661	0.662	0.633	0.633	0.653	0.732	0.732	0.732	0.104	0.136	0.146	0.16	0.552	0.451	0.578	0.534	0.534	0.104	0.29	0.243	0.414	0.405	0.197	0.269	0.291	0.176	0.405	0.27	0.266	0.384	0.416	0.28	0.353
Al2O3	8.6	8.9	7.795	7.994	6.854	6.298	7.892	8.123	7.921	8.018	7.741	7.834	5.209	5.209	5.282	5.166	5.109	5.177	5.192	5.192	5.492	5.166	5.166	5.166	3.382	3.394	3.521	3.7	2.951	2.086	3.458	2.976	2.976	1.026	2.42	1.059	2.11	1.183	1.543	2.343	2.103	1.404	1.183	2.168	1.338	1.649	1.115	1.871	0.852
FeO	4.663	4.746	5.381	5.011	5.642	6.148	5.415	5.186	4.881	5.064	5.424	5.271	6.068	6.242	6.116	6.281	6.166	6.248	6.402	6.402	6.488	6.16	6.16	6.16	3.437	3.302	3.547	3.649	6.834	6.504	6.849	6.522	6.522	4.008	4.642	4.262	4.949	3.244	4.863	4.881	4.067	5.322	3.244	4.494	4.283	4.563	3.458	4.7	4.308
MnO	0	0.065	0.041	0.048	0.055	0.106	0.055	0.075	0.031	0.017	0.045	0.045	0.038	0.041	0.098	0.038	0.075	0.083	0.019	0.019	0.102	0.139	0.139	0.139	0.076	0.03	0.034	0.114	0.147	0.219	0.162	0.17	0.17	0.161	0.104	0.078	0.128	0.034	0.064	0.15	0.258	0.161	0.034	0.129	0.034	0.136	0.122	0.086	0.082
MgO	11.806	11.725	11.635	11.611	11.532	11.9	11.694	11.538	12.03	11.944	11.651	11.634	14.266	14.016	14.039	14.099	14.101	14.002	14.036	14.036	13.559	13.998	13.998	13.998	15.679	15.604	15.792	15.687	14.614	14.965	14.657	14.518	14.518	18.172	16.134	18.212	16.504	17.873	17.857	16.617	17.418	17.772	17.873	16.658	17.912	18.041	18.029	17.245	19.061
CaO	22.451	22.546	22.499	22.542	22.202	22.495	22.258	22.418	22.137	22.188	22.182	22.228	20.326	20.378	20.304	20.47	20.221	20.344	20.399	20.399	19.917	20.184	20.184	20.184	21.218	21.412	21.471	21.352	21.763	22.204	20.435	21.03	21.03	19.537	19.443	20.242	19.66	21.836	18.501	19.492	19.731	18.066	21.836	19.853	20.92	18.585	20.515	18.88	18.676
Na2O	1.243	1.162	1.163	1.085	1.133	1.095	1.171	0.979	1.092	1.181	1.099	1.224	0.776	0.749	0.815	0.729	0.765	0.792	0.681	0.681	0.533	0.676	0.676	0.676	0.75	0.687	0.647	0.657	0.412	0.278	0.544	0.415	0.415	0.222	0.485	0.258	0.471	0.2	0.407	0.416	0.34	0.322	0.2	0.411	0.322	0.365	0.172	0.361	0.155
K2O	0	0.001	0.007	0	0	0.01	0.005	0.011	0.008	0	0.007	0	0	0.006	0.011	0.005	0.004	0.027	0.021	0.021	0.007	0.007	0.007	0.007	0.007	0	0.003	0.012	0.004	0	0.004	0.008	0.008	0.006	0	0.026	0.001	0.04	0.019	0	0.01	0	0.04	0.018	0.032	0.005	0.033	0.017	0
NiO	0.019	0.002	0.02	0	0.018	0.034	0.016	0	0.009	0.003	0	0	0	0	0	0	0	0	0	0	0	0	0	0	0	0	0	0	0	0	0	0	0	0.006	0.035	0.021	0.052	0.048	0.018	0.023	0.033	0.08	0.048	0.063	0.036	0.006	0	0.064	0
Cr2O3	0.054	0.072	0.004	0.005	0	0.02	0.031	0.059	0.07	0.034	0.023	0.05	0.097	0.088	0.046	0.106	0.065	0.018	0.041	0.041	0.009	0.051	0.051	0.051	0.504	0.541	0.457	0.462	0.069	0	0.028	0	0	0.417	0.694	0.815	0.541	0.809	0.521	0.571	0.508	0.324	0.809	0.563	0.933	0.257	0.385	0.405	0.392
P2O5	0.02	0.017	0.014	0	0	0.01	0	0	0	0.003	0.003	0.041	0.019	0.013	0.012	0	0.028	0.015	0.004	0.004	0.038	0.009	0.009	0.009	0.03	0.006	0.024	0.015	0.035	0	0.007	0.016	0.016	0.006	0.006	0	0.006	0	0	0.029	0	0	0	0.029	0	0.009	0	0	0.026
V2O3	0.036	0.031	0.009	0.016	0.035	0	0.009	0.015	0.029	0.013	0	0.031	0.065	0	0.106	0	0.106	0.008	0.04	0.04	0.008	0.186	0.186	0.186	0	0.016	0	0	0.041	0	0.106	0	0	0	0	0.016	0.013	0.049	0.009	0	0	0.007	0.049	0.027	0.029	0	0.037	0	0.022
Total	99.843	99.951	99.923	99.623	99.21	100.045	98.998	99.865	99.495	99.346	99.023	100.135	98.761	98.375	98.483	98.95	98.242	98.713	98.381	98.381	98.992	98.034	98.034	98.034	97.954	97.93	98.014	98.074	99.292	99.414	98.143	97.71	97.71	99.779	99.227	99.26	100.376	100.583	99.982	99.963	100.815	99.666	100.583	99.9	100.5	100.405	100.586	99.814	100.697
Mg#	81.8624	81.4954	79.4007	80.5091	78.4654	77.5306	79.3804	79.8636	81.4597	80.7862	79.2928	79.7351	80.7362	80.0114	80.3614	80.0062	80.3024	79.98	79.6267	79.6267	78.8383	80.2016	80.2016	80.2016	89.0497	89.389	88.8103	88.4575	79.219	80.3987	79.2313	79.872	79.872	88.9898	86.1032	88.3957	85.6008	90.7593	86.7479	85.8536	88.4188	85.6176	90.7593	86.8556	88.1731	87.5749	90.2859	86.7389	88.7482
En	38.6356	38.3281	37.7471	37.916	37.6205	37.7586	38.0559	37.7565	39.2139	38.866	38.0306	38.0618	44.197	43.5778	43.7866	43.604	43.9383	43.5817	43.4712	43.4712	43.0269	43.7988	43.7988	43.7988	47.7197	47.5078	47.5477	47.4219	42.8705	43.2871	44.1667	43.6096	43.6096	52.7312	49.3218	51.8111	49.3986	50.5082	52.7041	49.8052	51.4107	52.6711	49.8037	50.6707	53.1278	51.9374	51.5537	54.6159	53.4007
Fs	8.56015	8.70288	9.7929	9.17929	10.3249	10.943	9.88528	9.51974	8.92512	9.24368	9.93163	9.67351	10.5455	10.8867	10.7005	10.8968	10.7777	10.909	11.1226	11.1226	11.5493	10.8121	10.8121	10.8121	5.86801	5.63946	5.9908	6.18791	11.2459	10.5534	11.5773	10.9897	10.9897	6.52415	7.96038	6.80158	8.30949	5.14253	8.0514	8.20658	6.73381	8.84794	7.53708	6.79661	7.53778	5.58811	7.8818	6.92438	10.4155
Wo	52.8043	52.969	52.46	52.9047	52.0547	51.2984	52.0588	52.7238	51.861	51.8903	52.0378	52.2647	45.2575	45.5356	45.5129	45.4992	45.284	45.5092	45.4062	45.4062	45.4239	45.3891	45.3891	45.3891	46.4122	46.8527	46.4615	46.3902	45.8835	46.1595	44.256	45.4007	45.4007	40.7447	42.7178	41.3873	42.2919	44.3492	39.2445	41.9882	41.8555	38.481	42.6592	42.5327	39.3344	42.4745	40.5645	38.4597	36.1838
Trace elements
Li	34.5393	32.9191	29.6257	30.6935	39.5638	28.3583	33.0335	31.8214	32.3154	33.2149	33.4267	32.8333	58.38	60.81	63.5	68.7	60.7	58.78	66.3	59.8	62.5	65.6	67.4	69.5	23.9	41.3	37.2	27.71	29.7	19.97	16.45	16.66	16.83	6.2134	12.5105	14.0414	8.4632	14.3427	7.6618	10.2967	7.6901	8.3466	11.4994	12.7119	11.7017	12.8237	9.8848	14.2953	11.7774
Na	9209.32	9102.77	9128.27	8828.93	8916.96	8507.1	9313.67	9229.66	9222.18	9029.72	9387.28	9358.62	6230	6099	6090	6218	6017	5956	5558	5562	5580	6280	6320	6339	6031	5658	5326	5316	4743	4717	4590	4752	4900	2709.18	3497.69	4467.47	3865.35	3619.71	2960.67	2105.37	3193.64	4131.99	77.0901	3339.28	1493.03	2568.05	2250.84	2915.26	2908.01
Mg	81145.4	79735.6	79826.5	79684.2	78557.2	80387.8	79396.9	79110.7	81849.7	81653	79397.4	79293.5	83500	83520	84360	85100	84060	83500	84250	84500	84400	93700	95700	96000	96300	97700	96900	97300	87600	89000	87900	90100	92000	133141	113976	108205	115743	107278	126539	142555	123190	103693	270261	113512	132276	117587	105057	109283	128032
Al	43632.2	45019.7	39785.5	40289.6	34726.9	31868.4	39989.6	40575.4	40142.8	40634.9	39653.7	39598.7	28840	28100	28060	28870	28100	28350	28780	28010	30700	31370	31310	31430	18960	19570	19240	19670	14240	13770	13490	14070	14310	8943.67	11093.5	10351.3	10129.2	13586.7	9955.87	9668.34	10438.9	8451.67	222.319	11609.2	6885.05	8654.25	6773.17	10713.6	8204.33
P	17.2331	15.2726	15.1461	14.1296	17.44	10.6006	14.0008	13.1947	15.9621	17.0365	15.5199	16.597	22.1	22.7	22.9	27.1	23.6	25.6	28.7	26.2	42.7	25.2	25.5	14.8	34.7	26.5	25	29.5		14.4	14.5	14.3	22	117.993	95.7507	91.4692	114.427	132.302	128.016	68.5782	89.76	169.875	803.94	102.49	67.3014	79.5722	201.865	108.902	118.037
K	20.9684	21.9232	23.378	22.4517	682.075	22.7183	24.8676	24.138	22.537	21.7013	23.0335	23.2782	12.78	11.64	12.29	31.3	13.64	13.25	30.6	14.47	187	16.05	16.38	16.41	13.37	12	12.91	11.19	103	58.6	55.6	58.4	69.9	136.65	118.47	724.523	573.546	4769.95	152.897	746.94	73.8295	50.4445	145.134	2284.07	811.796	113.253	852.42	2992.28	2691.96
Ca	151956	152686	150779	151933	151190	153381	151008	151483	151110	151565	151075	150812	0	0	0	0	0	0	0	0	0	0	0	0	0	0	0	0	0	0	0	0	0	98071.2	133126	117109	119937	128306	106880	97290.3	116107	108997	870.958	131735	114174	141892	120295	124899	89769.3
Sc	11.2099	11.1294	10.8853	10.944	13.3492	13.7654	10.9408	11.1253	10.2417	10.3596	11.7908	11.8341	52.75	52.04	52.54	53.21	51.74	51.4	48.32	48.22	50.8	53.17	53.74	54.2	22.16	20.87	19.03	18.3	43.97	43.59	43.33	45.13	44.69	34.4243	48.7666	42.8815	39.5108	44.3305	39.8355	36.2449	40.8407	40.665	7.0294	53.4206	42.9947	49.9339	57.2425	39.012	29.8612
Ti	2367.84	2446.9	2233.83	2217.87	2079.48	2058.69	2395.86	2466.83	2209.76	2243.92	2620.62	2595.04	3989	3834	3849	3954	3975	3949	3886	3890	3879	4372	4364	4412	741	856	1020	1036	783	706	706	720	723	2040.98	2447.73	2256.22	2017.36	3131.38	2202.76	2078.91	2190.3	1841.16	63.4055	3109.16	3255.89	2540.8	3312.82	2397.95	1964.76
V	62.9985	63.4257	57.1447	56.364	83.7645	89.3101	60.7713	62.9214	56.9481	56.2072	62.559	63.3483	329.4	325.1	328.5	330.5	328.2	327.8	338.3	333.7	329.8	375.9	378.4	380.2	70.2	66.9	63.54	64.84	135.3	133	132.4	134.5	133.7	123.171	165.019	160.462	141.556	144.701	139.074	112.623	139.82	146.702	7.0243	173.819	160.611	148.507	183.066	121.379	100.407
Cr	349.172	303.576	172.893	159.231	221.409	203.552	406.945	425.26	231.687	211.146	256.66	250.087	668	668	659.4	643.8	630.8	621	710.9	694.4	678	804	791	803	4383	3907	3706	3477	106.5	105	117.3	130.5	115.8	5184.59	7649.96	5960.77	7328.08	6077.39	6710.51	6531.11	7649.66	5868.74	302.682	6265.61	4853.29	6862.88	5836.29	6411.52	5362.58
Mn	722.883	716.548	760.271	741.762	797.24	809.292	762.518	753.155	736.922	731.066	766.044	767.206	649.6	635.2	635.5	666.4	639.9	631.4	634.4	633.9	663	703.6	711	718.8	540.3	558.7	563.8	562.2	750	741	736	761.4	771	1359.05	1195.83	1287.99	1270.45	1073.79	1217.78	1249.99	1139.59	1158.67	1680.33	1172.78	1398.25	1122.22	1135.91	1036.72	1160.31
Fe	37763.2	37370.7	42636.9	41545.1	46260	47156.1	43063.2	42689.4	38784.6	38561.2	42732.6	42920.2	48740	48470	48330	50240	49120	48070	49410	49180	51700	55490	55560	55790	27310	27670	27290	27830	36110	35480	34600	36420	36920	47991.5	39970.3	43557.9	40536.7	33105.2	43112.4	43250.1	40825	44977.1	97466.2	36370.8	42422.9	34226.4	35745.3	35865.9	39753
Co	24.7065	24.1988	26.6335	26.2044	30.8649	31.3516	28.008	27.5903	24.9401	24.441	27.2423	27.2794	58.18	58.2	58.61	59.5	59.43	57.95	59.18	58.42	60.1	66.1	66	66.4	29.39	29.43	30.2	30.62	35.88	35.13	34.13	35.51	36.05	50.5236	38.5118	44.4864	41.0339	32.1393	46.2472	42.8358	41.8423	47.962	144.237	35.4919	37.9754	32.8098	32.0885	31.9082	45.462
Ni	181.99	176.628	195.98	189.992	231.786	233.609	213.491	201.47	181.541	175.589	199.699	201.068	179.1	178.3	178.6	182.2	179.4	179.7	182.1	181.5	187.7	214.4	208.8	208.7	424	412.2	419.2	419.7	136	130.4	129.1	135.2	134.6	528.616	343.627	459.72	418.952	428.184	534.588	574.775	506.588	549.788	2669.45	450.305	483.75	502.458	482.439	479.808	592.677
Cu	0.3988	0.3899	0.5748	0.4114	6.0349	0.4411	2.6011	0.4621	0.6855	0.3822	0.3496	0.4563	7.84	6.34	6.42	8.91	6.54	6.35	7.87	6.66	14.6	7.3	7.18	7.49	0.357	2.19	1.62	0.79	4.38	3.83	3.21	3.42	3.76	22.5203	28.3062	34.9929	7.6674	13.4287	14.3246	54.4196	35.0619	7.5828	13.5238	36.1429	43.758	5.9349	21.0219	161.821	7.3598
Zn	104.787	102.223	116.509	113.723	135.426	136.981	116.969	114.216	106.079	103.823	121.927	122.639	60.4	62.3	63.3	63.4	60.9	61.2	64.7	64.3	72.3	72.5	73.2	72.5	40.15	39.7	38.19	37.67	33.4	33.7	32.73	34.56	35.38	75.9832	50.3698	49.9803	51.3822	41.0651	62.3968	73.5551	55.8493	55.3069	202.818	49.3172	71.4858	44.7457	50.3963	52.6623	57.938
Rb	0.014	0.0132	0.011	0.0109	3.4848	0.0105	0.012	0.0115	0.0126	0.0121	0.0128	0.0138	0	0	0	0.147	0	0	0.134	0	2.1	0	0	0	0	0	0	0	0.3	0	0	0	0.056	1.12	1.3289	8.3128	4.8391	56.9293	1.0691	10.2224	0.9913	0.1873	1.4796	26.4969	9.8312	0.94	9.4663	38.0968	33.2919
Sr	126.179	123.73	109.3	106.481	133.95	119.338	120.281	119.779	124.416	124.174	128.514	129.103	58.44	55.09	57.48	59.63	58.28	58.36	58.08	57.55	59.2	64.23	64.46	65.37	115.2	112.2	110.9	110.4	164.7	165.7	166.5	171.1	170.5	74.7162	132.105	117.91	114.859	170.237	100.318	77.3854	110.67	115.062	0.9905	135.103	86.8955	106.603	101.793	121.403	88.8634
Y	25.2752	26.3883	21.5385	21.8055	17.0675	16.6772	21.1349	21.3651	24.4491	24.9069	22.1384	22.0303	2.838	2.761	2.799	2.858	2.827	2.783	2.686	2.606	2.77	2.945	3.028	2.997	19.13	20.87	23.08	23.5	6.48	6.14	6.12	6.13	6.32	10.7342	17.6077	15.3978	14.033	15.9517	12.8613	10.8529	13.2464	14.1421	0.5769	17.5153	14.7091	14.7898	14.4175	11.3361	9.0661
Zr	219.949	229.819	196.098	202.524	149.942	150.052	183.287	191.042	211.407	224.07	193.554	189.793	33.21	32.66	32.09	34.43	32.44	32.33	31.45	31.01	32.85	34.55	34.72	34.7	72.7	77.9	79.43	83.2	30.44	27.54	26.51	28.29	28.82	28.3866	42.3444	37.2	36.6636	76.0827	33.7699	29.013	35.0405	32.7162	2.0535	62.1706	31.4798	29.6486	35.237	56.6921	29.009
Nb	0.4943	0.517	0.4386	0.4459	0.3148	0.2207	0.3792	0.4239	0.4784	0.4628	0.3656	0.3513	0	0	0.0057	0.0159	0.0027	0.0014	0.0112	0.0061	0.058	0.0019	0.0056	0	0.289	0.349	0.302	0.321	0.034	0.0136	0.0137	0.0094	0.0134	0.1994	0.2302	0.1792	0.2468	2.5634	0.2809	0.4897	0.1171	0.1154	0.1359	1.4199	0.4099	0.0507	0.5981	1.3682	0.9074
Cs	0.0063	0.0055	0.0057	0.0063	0.0921	0.006	0.0064	0.0064	0.0071	0.0066	0.0067	0.007	0	0	0	0.035	0	0	0.029	0	0.35	0	0	0	0	0	0	0	0.021	0	0	0	0	0.1184	0.1524	0.4093	0.2524	2.4861	0.1162	0.6275	0.1675	0.0532	0.204	1.1564	0.5994	0.1504	0.3086	4.2148	1.2755
Ba	0.0445	0.0184	0.0093	0.0152	10.1475	0.026	0.0675	0.0627	0.0525	0.0244	0.0495	0.0091	0.008	0	0	0.194	0.015	0.003	0.108	0	2.8	0	0	0.008	0	0	0.016	0.0032	0.44	0.108	0.082	0.112	0.82	5.9743	2.3777	7.0166	12.5404	129.257	7.5694	19.9195	1.1854	0.499	2.1993	74.921	19.9235	0.9806	17.4789	50.495	42.3748
La	24.1833	24.5539	21.3752	21.7343	18.1441	17.4262	21.0094	20.942	24.642	24.5024	21.9148	21.5015	10.99	10.88	11.06	10.87	10.5	10.48	11.4	11.49	11.38	12.48	12.5	12.81	35.5	36.26	38.61	37.18	3.76	3.444	3.535	3.63	3.7	4.2504	6.8711	5.84	5.6425	11.4869	5.7189	4.7095	6.0779	6.5183	0.142	9.6363	6.5914	6.2237	7.5941	7.6491	5.568
Ce	63.7134	64.8847	56.4535	55.9515	45.9909	44.8739	55.1814	55.647	63.8702	64.0306	56.6591	56.3459	29.94	28.69	29.23	28.29	27.88	27.62	32.03	32.31	32.26	35.17	34.85	34.95	81.3	80.34	84.3	82.2	16.9	16.02	16.07	16.45	16.71	21.7533	35.7517	31.2587	28.9365	44.539	27.5371	22.4288	29.0184	29.9367	0.1033	40.9213	31.0708	30.1317	35.1767	31.2392	22.9529
Pr	7.8839	7.8697	6.7988	6.7528	5.5369	5.4059	6.7865	6.8904	7.693	7.7512	6.8886	6.7728	3.813	3.584	3.617	3.566	3.477	3.497	4.2	4.194	4.195	4.59	4.55	4.5	9.52	9.15	9.49	9.18	3.1	3.016	2.996	3.107	3.16	4.5824	7.8249	6.638	6.4023	8.7118	6.0462	4.6534	6.5481	6.8246	0.0107	8.5763	6.8847	6.9034	7.2324	6.0773	4.9146
Nd	29.4753	30.3401	26.334	25.8365	20.8451	20.5985	26.0843	26.088	29.3464	29.4346	25.7549	25.4463	15.38	14.14	14.84	14.35	14.27	13.92	17.43	17.36	17.11	18.34	18.19	18.3	36.17	33.67	35.18	33.82	16.65	15.83	15.36	16.13	16.74	31.8321	49.6441	47.0581	42.2366	53.7717	39.0667	29.9397	41.4144	43.8681	0.0291	51.9852	41.6416	42.2732	44.322	37.1487	27.7101
Sm	5.3618	5.8705	5.0772	4.9741	3.942	3.9831	5.1213	5.2423	5.6362	5.691	5.1168	4.7633	3.21	3.13	3.28	3.37	3.25	2.9	3.56	3.39	3.51	3.75	3.82	3.74	6.23	6.27	6.46	6.34	4.4	4.16	4.07	4	4.41	9.5739	15.0693	13.1145	12.7372	16.0152	12.3522	8.5695	12.3093	13.9188	0.0673	18.4635	11.4846	12.9746	13.059	11.2994	8.5827
Eu	0.8812	0.9011	0.7524	0.7684	0.5611	0.5696	0.7641	0.7559	0.8458	0.8761	0.7543	0.7638	0.746	0.74	0.762	0.798	0.737	0.713	0.792	0.794	0.758	0.847	0.84	0.9	0.971	0.918	0.932	0.902	0.965	0.895	0.883	0.922	0.932	1.3809	2.766	2.4004	2.0732	2.408	1.9275	1.2857	1.9315	2.1763	0.0081	2.275	1.9858	1.9922	2.3432	1.9988	1.2837
Gd	5.0195	5.0707	4.1193	4.1036	3.3634	3.2754	4.2584	4.2642	4.8778	4.8137	4.3282	4.5286	2.27	2.1	2.24	2.28	2.18	2.18	2.44	2.23	2.26	2.69	2.46	2.54	4.73	4.81	5.03	5.13	3.18	3	2.95	3.04	3.17	5.4785	8.9093	6.9679	8.1016	9.1332	7.3971	4.4493	7.6886	7.7786	0.0305	9.2142	7.4324	7.7387	8.5954	6.3422	5.2178
Tb	0.726	0.766	0.6374	0.6603	0.5143	0.4932	0.6223	0.6511	0.7336	0.7254	0.6562	0.6311	0.233	0.232	0.24	0.25	0.234	0.232	0.238	0.238	0.224	0.243	0.255	0.262	0.635	0.658	0.709	0.723	0.324	0.348	0.341	0.373	0.374	0.6086	0.8948	0.7273	0.7799	0.9113	0.7455	0.4492	0.7507	0.8328	0.0043	0.95	0.8697	0.7613	0.8927	0.735	0.4958
Dy	4.6366	4.809	3.8642	3.9543	3.1629	3.0565	4.0201	3.9734	4.4628	4.6067	4.0705	3.9791	1.023	0.902	0.952	0.954	0.996	1.001	0.878	0.867	0.948	1.087	0.993	1.041	3.61	3.77	4.21	4.36	1.62	1.667	1.619	1.602	1.77	2.4876	4.5923	3.4847	3.9434	4.0802	3.331	2.6011	3.6319	3.6826	0.0369	4.4491	4.0637	3.4246	4.372	2.7483	2.4698
Ho	0.9243	0.9654	0.8274	0.8099	0.6214	0.6123	0.7595	0.8015	0.9261	0.9246	0.8177	0.837	0.13	0.115	0.12	0.111	0.117	0.127	0.095	0.1126	0.116	0.115	0.13	0.116	0.673	0.751	0.817	0.827	0.229	0.257	0.235	0.264	0.246	0.3761	0.5207	0.7035	0.5393	0.5687	0.4674	0.4679	0.5579	0.5917	0.0091	0.6731	0.6259	0.5882	0.6275	0.4358	0.338
Er	2.7716	2.8459	2.2709	2.3129	1.9356	1.8557	2.3236	2.3323	2.6454	2.7497	2.3958	2.363	0.238	0.209	0.221	0.253	0.218	0.24	0.194	0.187	0.233	0.21	0.237	0.233	1.871	2.083	2.24	2.368	0.585	0.505	0.533	0.548	0.557	1.049	1.5031	1.6969	1.3679	1.2887	1.2022	1.1509	1.3596	1.3858	0.0628	1.7665	1.4676	1.0635	1.5651	1.2879	0.8902
Tm	0.3742	0.4037	0.3272	0.324	0.2607	0.2557	0.3267	0.3191	0.3738	0.3778	0.3366	0.3117	0.0175	0.0171	0.0228	0.0163	0.0212	0.0216	0.0157	0.0172	0.0227	0.0244	0.0223	0.0204	0.239	0.263	0.302	0.345	0.067	0.057	0.0604	0.0673	0.0637	0.1419	0.1877	0.1442	0.113	0.175	0.1499	0.1064	0.121	0.1391	0.0118	0.2092	0.1426	0.2027	0.1138	0.1102	0.1124
Yb	2.648	2.7248	2.2826	2.2618	1.9065	1.9063	2.2288	2.3427	2.6154	2.6365	2.4252	2.3839	0.068	0.09	0.075	0.077	0.106	0.089	0.078	0.105	0.104	0.099	0.119	0.094	1.538	1.646	1.94	1.96	0.276	0.326	0.323	0.353	0.36	0.8267	1.1812	1.1024	1.0815	1.0799	0.7289	0.787	0.834	1.0174	0.1296	1.402	1.0129	1.1319	1.4021	0.7493	0.6553
Lu	0.3853	0.404	0.3158	0.3351	0.3001	0.3044	0.3515	0.3338	0.3679	0.3793	0.3567	0.3463	0.0064	0.0107	0.0056	0.0113	0.0085	0.0103	0.008	0.0063	0.0083	0.0139	0.0114	0.011	0.204	0.226	0.254	0.276	0.046	0.0468	0.0491	0.0385	0.0469	0.0928	0.18	0.1297	0.1532	0.1676	0.1016	0.0794	0.1153	0.1241	0.0158	0.1788	0.1249	0.1489	0.1132	0.1289	0.0993
Hf	6.463	6.6093	5.6119	5.8112	5.1796	5.4989	6.3186	6.4547	6.6698	6.8966	7.5161	7.0349	1.348	1.343	1.378	1.345	1.344	1.339	1.346	1.285	1.309	1.476	1.376	1.404	3.33	3.16	3.38	3.57	1.33	1.231	1.194	1.286	1.188	1.1168	2.3585	1.9965	1.6786	3.0245	1.7666	1.1166	1.8097	1.8744	0.0685	2.3169	1.3316	1.5071	2.0287	1.9808	1.2469
Ta	0.1552	0.1642	0.0879	0.1004	0.063	0.0579	0.0928	0.0947	0.1572	0.1683	0.1061	0.1057	0	0.00022	0	0	0	0	0	0	0.0013	0	0	0	0.0584	0.0607	0.0622	0.0715	0.0062	0	0	0.0014	0.0014	0.0245	0.025	0.0239	0.0181	0.1258	0.006	0.0415	0.0027	0.0074	0.0132	0.0727	0.0271	0.0005	0.0206	0.1107	0.0377
Tl	0.003	0.0031	0.0031	0.0031	0.0123	0.0026	0.0034	0.0036	0.0031	0.0028	0.0032	0.003	0	0	0	0	0	0	0	0	0	0	0	0	0	0	0	0	0	0	0	0	0	0.0324	0.0365	0.0725	0.0595	0.9429	0.0353	0.2371	0.0246	0.0336	0.0701	0.2416	0.2168	0.0368	0.1202	0.6397	0.482
Pb	2.2898	2.2537	2.421	2.4307	2.6914	2.1992	2.4089	2.336	2.3796	2.3262	2.2152	2.3015	1.168	1.155	1.198	1.15	1.215	1.18	1.112	1.08	1.41	1.28	1.232	1.163	1.719	1.798	1.906	1.798	2.07	1.961	1.865	2.008	2.016	1.0733	1.1204	1.4039	1.0532	5.0134	1.0338	1.4442	1.2146	1.2809	1.1726	2.7924	1.7777	0.6534	1.3017	4.1301	3.0648
Th	1.323	1.3618	0.9858	1.0628	0.7124	0.6036	0.9492	0.9635	1.2009	1.1674	0.9651	0.9666	1.663	1.644	1.55	1.721	1.642	1.706	1.662	1.627	1.662	1.795	1.824	1.817	4.41	4.94	5.346	5.31	0.645	0.397	0.362	0.381	0.466	2.4534	1.1059	0.7948	1.358	13.565	1.5439	3.1518	1.0384	0.7098	0.7638	7.8326	3.3443	0.7731	2.5963	6.9117	5.5735
U	0.2754	0.2732	0.1961	0.2156	0.1489	0.1184	0.1859	0.2032	0.2426	0.2436	0.1963	0.1827	0.135	0.104	0.128	0.13	0.144	0.123	0.136	0.128	0.168	0.138	0.157	0.151	0.789	0.865	0.934	0.975	0.042	0.0347	0.0388	0.0315	0.042	0.1575	0.1098	0.1922	0.1593	1.5762	0.1268	0.2753	0.1134	0.0587	0.0218	0.8886	0.3112	0.078	0.2666	0.9168	0.6867
Sr/Y	4.99221	4.68882	5.07464	4.8832	7.84825	7.15573	5.69112	5.60627	5.08878	4.98551	5.80502	5.86024	20.592	19.9529	20.5359	20.8642	20.6155	20.9702	21.6232	22.0837	21.3718	21.8098	21.288	21.8118	6.02196	5.37614	4.80503	4.69787	25.4167	26.987	27.2059	27.9119	26.9778	6.96057	7.50271	7.65758	8.18495	10.672	7.79997	7.13039	8.35474	8.1361	1.71694	7.71346	5.9076	7.20784	7.06034	10.7095	9.80172
Ba/La	0.00184011	0.000749372	0.000435084	0.000699355	0.559273	0.00149201	0.00321285	0.00299398	0.00213051	0.000995821	0.00225875	0.000423226	0.000727934	0.000727934	0.000727934	0.0178473	0.00142857	0.00028626	0.00947368	0	0.246046	0	0	0.000624512	0	0	0.0004144	8.60678e-05	0.117021	0.0313589	0.0231966	0.030854	0.221622	1.40559	0.346044	1.20147	2.22249	11.2526	1.32358	4.22964	0.195034	0.0765537	0	7.77487	3.02265	0.157559	2.30164	6.60143	7.61042
Th/Yb	0.499622	0.49978	0.431876	0.469891	0.373669	0.316634	0.425879	0.411278	0.459165	0.442784	0.397947	0.40547	24.4559	18.2667	20.6667	22.3506	15.4906	19.1685	21.3077	15.4952	15.9808	18.1313	15.3277	19.3298	2.86736	3.00122	2.75567	2.70918	2.33696	1.21779	1.12074	1.07932	1.29444	2.9677	0.936251	0.720972	1.25566	12.5613	2.11812	4.00483	1.24508	0.697661	0	5.58673	3.30171	0.683011	1.85172	9.22421	8.50526
Ti/Eu	2687.07	2715.46	2968.94	2886.34	3706.07	3614.26	3135.53	3263.43	2612.63	2561.26	3474.24	3397.54	5347.18	5181.08	5051.18	4954.89	5393.49	5538.57	4906.57	4899.24	5117.41	5161.75	5195.24	4902.22	763.131	932.462	1094.42	1148.56	811.399	788.827	799.547	780.911	775.751	1478.01	884.934	939.937	973.067	1300.41	1142.81	1616.95	1133.99	846.003	0	1366.67	1639.59	1275.37	1413.8	1199.7	1530.55
(La/Yb)N	6.55086	6.46378	6.71709	6.89274	6.82652	6.5571	6.7615	6.41213	6.75831	6.66625	6.48172	6.46966	115.928	86.7135	105.778	101.26	71.0533	84.464	104.836	78.4931	78.4891	90.4232	75.3466	97.7511	16.5567	15.8015	14.2757	13.6067	9.77191	7.57785	7.85032	7.3762	7.37225	3.68793	4.17257	3.79992	3.74236	7.62992	5.62788	4.2924	5.22743	4.59561	0	4.93018	4.66779	3.94404	3.88506	7.32243	6.0948
Nb/Ta	3.18492	3.1486	4.98976	4.44124	4.99683	3.81174	4.08621	4.47624	3.04326	2.74985	3.44581	3.32356	0	0	0	0	0	0	0	0	44.6154	0	0	0	4.94863	5.74959	4.85531	4.48951	5.48387	0	0	6.71429	9.57143	8.13878	9.208	7.49791	13.6354	20.3768	46.8167	11.8	43.3704	15.5946	0	19.5309	15.1255	0	29.034	12.3595	24.069
V/Sc	5.6199	5.69893	5.24971	5.15022	6.27487	6.48801	5.55456	5.6557	5.56041	5.42561	5.30575	5.35303	6.24455	6.24712	6.25238	6.21124	6.34325	6.37743	7.00124	6.92036	6.49213	7.06978	7.04131	7.01476	3.16787	3.20556	3.33894	3.54317	3.0771	3.05116	3.05562	2.98028	2.99172	3.57802	3.38386	3.742	3.58272	3.26413	3.49121	3.10728	3.42354	3.60758	0.999274	3.25378	3.7356	2.97408	3.19807	3.11133	3.36247
In-situ Sr isotope
87Sr/86Sr	0.714345	0.713773	0.714285	0.71465	0.714747	0.714043	0.714806	0.713484	0.714582	0.714324	0.71418	0.714104	0	0	0	0	0	0	0	0	0	0	0	0	0	0	0	0	0	0	0	0	0	0	0	0	0	0.718833	0.718345	0.716887	0	0	0	0.717171	0.717198	0	0	0.718606	0.718362
2σ	0.000669185	0.000482791	0.000374304	0.000433271	0.000437943	0.000376391	0.00040797	0.000502919	0.000364403	0.000345873	0.000353163	0.000321748	0	0	0	0	0	0	0	0	0	0	0	0	0	0	0	0	0	0	0	0	0	0	0	0	0	0.00074	0.000258	0.000402	0	0	0	0.000268577	0.000275591	0	0	0.000425	0.000269121
85Rb(v)	0.0480336	0.000364502	-0.00018407	0.000130226	0.0284609	0.000177703	0.000309809	0.024253	0.000191487	0.00019665	0.00162738	9.51528e-05	0	0	0	0	0	0	0	0	0	0	0	0	0	0	0	0	0	0	0	0	0	0	0	0	0	0.002772	0.001341	0.000303	0	0	0	0.004126	0.014072	0	0	0.003439	0.04329
88Sr(v)	0.486323	0.459098	0.582661	0.512098	0.611466	0.585321	0.546983	0.575558	0.602617	0.62064	0.58919	0.614352	0	0	0	0	0	0	0	0	0	0	0	0	0	0	0	0	0	0	0	0	0	0	0	0	0	0.881365	1.05077	0.584194	0	0	0	0.148203	0.827912	0	0	0.983912	5.24182
84Sr/86Sr	0.0537144	0.0459603	0.0543709	0.0544823	0.0563004	0.0563284	0.053676	0.0504261	0.0549131	0.0556128	0.0514214	0.0512241	0	0	0	0	0	0	0	0	0	0	0	0	0	0	0	0	0	0	0	0	0	0	0	0	0	0.058395	0.05802	0.063089	0	0	0	0.042805	0.057834	0	0	0.056461	0.056835
2σ	0.00247751	0.00264194	0.00192646	0.00214445	0.00165537	0.00179909	0.00192109	0.0019448	0.001749	0.00166968	0.00191219	0.00172168	0	0	0	0	0	0	0	0	0	0	0	0	0	0	0	0	0	0	0	0	0	0	0	0	0	0.001781	0.001153	0.001719	0	0	0	0.007329	0.001332	0	0	0.001015	0.000336
87Rb/86Sr	0.315963	0.00252212	-0.00104214	0.00083566	0.154715	0.000956062	0.00157285	0.14075	0.000908514	0.00100519	0.00959267	0.000494894	0	0	0	0	0	0	0	0	0	0	0	0	0	0	0	0	0	0	0	0	0	0	0	0	0	0.010271	0.004238	0.001722	0	0	0	0.091107	0.057961	0	0	0.011637	0.028203
2σ	0.0319931	0.000328473	0.000111927	0.000275632	0.00271855	0.000221659	0.000514447	0.0152154	0.00062882	0.000256433	0.000780968	0.000130702	0	0	0	0	0	0	0	0	0	0	0	0	0	0	0	0	0	0	0	0	0	0	0	0	0	0.002301	0.000468	0.000469	0	0	0	0.009335	0.009192	0	0	0.001475	0.001365
Note: Data of sample number marked with * have been published in ref. 15 in main text.
[truncated: 21 more columns]

## Sheet: Precision of trace element_ppm
Sample	Li7	Na23	Mg24	Al27	Si29	P31	K39	Ca43	Sc45	Ti49	V51	Cr53	Mn55	Fe57	Co59	Ni62	Cu63	Zn66	Rb85	Sr88	Y89	Zr90	Nb93	Cs133	Ba137	La139	Ce140	Pr141	Nd146	Sm147	Eu153	Gd157	Tb159	Dy163	Ho165	Er166	Tm169	Yb172	Lu175	Hf178	Ta181	Tl205	Pb208	Th232	U238
C01-1	0.2664	44.9638	488.853	237.317	10.138	1.3363	0.2884	1269.29	0.1338	29.7376	0.4716	3.9393	3.6853	678.109	0.2508	4.2856	0.0385	1.3248	0.0028	0.9485	0.1906	1.5669	0.0192	0.0029	0.0147	0.1537	0.4332	0.0705	0.3036	0.1116	0.0202	0.1145	0.0145	0.0831	0.0178	0.0541	0.0101	0.0584	0.0108	0.0869	0.0065	0.0017	0.036	0.0187	0.0078
C01-2	0.2407	45.2309	460.131	192.352	9.341	1.1265	0.2829	1016.9	0.1193	29.2086	0.4363	3.4245	3.662	674.917	0.2086	4.1931	0.0331	1.1042	0.0042	0.7606	0.1814	1.3885	0.0171	0.0023	0.0077	0.1467	0.378	0.0695	0.2954	0.1119	0.0215	0.0922	0.0141	0.0604	0.0144	0.0507	0.0099	0.0612	0.009	0.0716	0.0076	0.0012	0.0344	0.0236	0.0071
C01-3	0.2377	33.8524	467.933	188.64	9.8416	1.2248	0.3233	1142.59	0.1048	27.5711	0.3623	2.2756	3.8381	765.75	0.2332	4.8928	0.0464	1.2603	0.0065	0.7672	0.1673	1.2076	0.0166	0.0022	0.0061	0.1397	0.3323	0.062	0.2573	0.1046	0.0179	0.0872	0.0114	0.0627	0.0126	0.0405	0.0084	0.0545	0.0089	0.074	0.0062	0.0014	0.0283	0.0152	0.0071
C01-4	0.2239	37.2876	468.797	184	8.4874	1.2584	0.2846	985.006	0.1294	26.8607	0.3958	1.9209	3.8499	749.03	0.2211	4.3726	0.0368	1.1955	0.0043	0.6406	0.1505	1.2797	0.0156	0.0022	0.0071	0.1347	0.3143	0.0566	0.263	0.1007	0.0193	0.0959	0.0121	0.0599	0.0137	0.0477	0.009	0.0493	0.0086	0.0803	0.0059	0.0012	0.0384	0.0156	0.0074
C01-5	0.4026	57.1886	457.25	154.772	7.3454	1.229	35.5879	1112.11	0.1435	25.9961	0.5164	2.6247	3.8843	827.262	0.2366	5.4232	0.5274	1.4532	0.2907	1.0435	0.147	1.2579	0.0106	0.0127	0.8129	0.1552	0.2918	0.0552	0.2577	0.0844	0.0125	0.0896	0.0116	0.0595	0.0122	0.0381	0.0065	0.0452	0.0081	0.0774	0.0054	0.0026	0.0454	0.0166	0.0065
C01-6	0.2192	36.8316	458.959	148.675	8.1076	1.147	0.3451	963.324	0.1428	24.0943	0.56	2.4734	4.0296	845.709	0.2456	5.3005	0.0357	1.375	0.0055	0.7733	0.1117	0.9378	0.0104	0.0015	0.0113	0.1216	0.282	0.0441	0.2296	0.0858	0.0158	0.0866	0.0112	0.0576	0.0142	0.0397	0.0072	0.0433	0.0083	0.072	0.0037	0.0098	0.0398	0.0113	0.0049
C01-7	0.4258	31.2179	467.702	172.49	9.294	1.2667	0.4366	1020.7	0.1231	27.5749	0.4086	4.5628	3.8392	776.205	0.2226	4.7214	0.1112	1.2873	0.009	0.6033	0.1373	1.0667	0.0181	0.0016	0.038	0.1354	0.3193	0.0663	0.2605	0.0954	0.0181	0.0846	0.0101	0.0728	0.0123	0.0377	0.0085	0.0498	0.0093	0.0738	0.0049	0.0009	0.0515	0.015	0.007
C01-8	0.2541	49.1075	482.922	200.681	9.614	1.239	0.3789	976.569	0.1523	29.6766	0.4513	4.6062	3.8621	769.799	0.2138	4.8581	0.051	1.3364	0.0048	0.6777	0.1421	1.2854	0.0202	0.002	0.0228	0.134	0.3065	0.0565	0.2476	0.0935	0.0169	0.0945	0.0129	0.0644	0.0163	0.0448	0.0087	0.0549	0.0088	0.0859	0.0072	0.0012	0.0421	0.0132	0.007
C01-9	0.2279	43.7543	483.009	182.611	10.3339	1.2528	0.2951	1140.04	0.1318	27.2336	0.3784	2.934	3.5206	696.565	0.2013	4.2144	0.0529	1.1474	0.0068	0.774	0.1729	1.2908	0.0173	0.0017	0.0278	0.1421	0.3486	0.0753	0.3287	0.1107	0.0207	0.0899	0.0169	0.081	0.0146	0.0457	0.0091	0.0521	0.0094	0.0666	0.0096	0.0008	0.0348	0.0186	0.0077
C01-10	0.258	40.8333	465.586	196.256	7.2247	1.0591	0.2889	1092.2	0.1006	26.5698	0.3787	2.5812	3.6258	693.755	0.2041	4.3617	0.039	1.0679	0.0039	0.7621	0.177	1.4474	0.0178	0.0012	0.0105	0.1411	0.3731	0.0575	0.2778	0.1101	0.019	0.1048	0.0133	0.08	0.0143	0.046	0.0098	0.0551	0.0093	0.0691	0.006	0.0011	0.0365	0.0152	0.0067
C01-11	0.2566	47.0265	462.538	193.801	7.5323	1.0519	0.3219	1067.53	0.1301	32.3293	0.4221	3.1005	3.8018	765.064	0.2089	5.005	0.0379	1.2968	0.0051	0.8957	0.1551	1.3205	0.0142	0.003	0.0317	0.1382	0.3339	0.0656	0.2629	0.1049	0.0194	0.0977	0.0123	0.0637	0.0136	0.0397	0.009	0.0568	0.0091	0.0846	0.0052	0.0009	0.0344	0.0152	0.0072
C01-12	0.2572	43.5433	455.95	166.105	8.7586	1.147	0.2699	1055.32	0.1253	29.7775	0.3608	3.0297	3.9375	773.137	0.1836	5.1108	0.0705	1.2694	0.0041	0.7549	0.1694	1.0921	0.0167	0.0023	0.006	0.1121	0.3111	0.065	0.2122	0.0875	0.0194	0.085	0.0129	0.0579	0.0162	0.0387	0.0072	0.0531	0.0081	0.09	0.0062	0.0014	0.0377	0.0173	0.0057
C02-1	0.83	77	1200	350	3000	3.5	0.54	-	0.69	46	4.2	11	7.5	680	0.92	4.7	0.27	1.3	Below LOD	0.83	0.086	0.55	Below LOD	Below LOD	0.011	0.19	0.44	0.081	0.43	0.19	0.046	0.14	0.018	0.079	0.012	0.035	0.0046	0.022	0.0031	0.089	Below LOD	Below LOD	0.08	0.05	0.014
C02-2	0.97	98	960	300	2700	3.8	0.44	-	0.72	43	4.4	11	8.9	780	1	5.1	0.23	1.3	Below LOD	0.69	0.09	0.53	Below LOD	Below LOD	Below LOD	0.18	0.38	0.082	0.44	0.23	0.058	0.14	0.019	0.076	0.013	0.028	0.0049	0.023	0.0033	0.072	0.00048	Below LOD	0.07	0.067	0.014
C02-3	1.1	99	950	300	3200	4.6	0.49	-	0.75	50	4.4	9.5	7.8	680	0.92	4.6	0.24	1.4	Below LOD	0.68	0.078	0.57	0.0034	Below LOD	Below LOD	0.2	0.4	0.086	0.47	0.21	0.044	0.16	0.021	0.077	0.013	0.029	0.0058	0.021	0.0025	0.078	Below LOD	Below LOD	0.064	0.062	0.015
C02-4	2.7	94	990	380	3400	4.3	2.8	-	0.75	54	4.2	8.9	8.8	760	1.1	5.3	0.45	1.3	0.037	0.84	0.097	0.6	0.0058	0.01	0.065	0.18	0.44	0.081	0.34	0.19	0.05	0.16	0.02	0.079	0.013	0.039	0.0046	0.022	0.0038	0.09	Below LOD	Below LOD	0.062	0.057	0.014
C02-5	1.3	82	970	310	3800	3.6	0.61	-	0.68	57	4.2	8.5	7.3	700	0.97	4.8	0.25	1.5	Below LOD	0.81	0.081	0.49	0.0024	Below LOD	0.015	0.19	0.38	0.091	0.36	0.17	0.046	0.16	0.02	0.085	0.013	0.032	0.0048	0.027	0.0034	0.069	Below LOD	Below LOD	0.061	0.05	0.017
C02-6	0.87	95	1000	250	3000	2.7	0.5	-	0.79	44	3.7	9.4	7.8	660	0.98	5.7	0.27	1.1	Below LOD	0.87	0.086	0.44	0.0017	Below LOD	0.0064	0.17	0.44	0.082	0.38	0.17	0.04	0.13	0.02	0.068	0.013	0.034	0.0062	0.021	0.0037	0.097	Below LOD	Below LOD	0.067	0.06	0.014
C03-1	1.1	79	960	390	3400	3.5	5.8	-	0.68	44	3.8	9.7	7.4	670	0.96	5.3	0.35	1.2	0.057	0.76	0.081	0.47	0.0057	0.016	0.056	0.25	0.4	0.095	0.43	0.22	0.054	0.16	0.018	0.071	0.011	0.028	0.0046	0.022	0.0029	0.095	Below LOD	Below LOD	0.058	0.061	0.015
C03-2	1	66	1000	290	3600	3.6	0.44	-	0.63	45	4.1	7.6	8.6	630	0.83	5.5	0.27	1.1	Below LOD	0.76	0.07	0.56	0.0034	Below LOD	Below LOD	0.19	0.4	0.092	0.4	0.15	0.05	0.14	0.018	0.058	0.0084	0.029	0.0044	0.025	0.0027	0.08	Below LOD	Below LOD	0.058	0.057	0.016
C03-3	1.8	110	1400	1200	6100	8	72	-	1.6	55	4.3	11	19	1600	1.8	6.8	1.6	3.2	0.97	1.4	0.1	0.98	0.021	0.13	1.3	0.31	0.48	0.094	0.42	0.18	0.045	0.13	0.018	0.067	0.013	0.031	0.0056	0.024	0.0032	0.088	0.0013	Below LOD	0.16	0.074	0.027
C03-4	1	100	1200	420	3800	4.1	0.6	-	0.82	52	4.6	12	9.2	870	1.2	7	0.24	1.3	Below LOD	0.97	0.088	0.66	0.0022	Below LOD	Below LOD	0.24	0.54	0.11	0.53	0.22	0.062	0.17	0.02	0.096	0.012	0.031	0.0066	0.028	0.0042	0.096	Below LOD	Below LOD	0.072	0.062	0.018
C03-5	1.4	100	1300	400	3900	4.4	0.57	-	0.78	47	5.1	12	11	870	1.3	5.5	0.25	1.5	Below LOD	0.92	0.096	0.66	0.0033	Below LOD	Below LOD	0.24	0.48	0.1	0.5	0.2	0.047	0.16	0.021	0.097	0.016	0.038	0.0054	0.029	0.0042	0.082	Below LOD	Below LOD	0.084	0.061	0.02
C03-6	1.2	92	1100	350	3300	4.2	0.52	-	0.87	53	4.9	13	9.8	860	1.1	5.8	0.29	1.5	Below LOD	0.77	0.094	0.57	Below LOD	Below LOD	0.011	0.22	0.46	0.1	0.43	0.18	0.048	0.18	0.021	0.076	0.014	0.033	0.0049	0.03	0.0049	0.096	Below LOD	Below LOD	0.076	0.062	0.02
C04-1	0.61	88	1200	240	3700	4.1	0.64	-	0.45	13	1.1	65	7.5	460	0.64	9.8	0.06	0.97	Below LOD	1.5	0.29	1.1	0.027	Below LOD	Below LOD	0.48	1	0.2	0.7	0.28	0.067	0.23	0.033	0.15	0.032	0.09	0.016	0.097	0.018	0.15	0.0078	Below LOD	0.08	0.1	0.043
C04-2	1.5	81	1300	250	3500	4.6	0.47	-	0.4	12	1.1	56	8	350	0.51	9.5	0.21	1	Below LOD	1.5	0.33	1.1	0.028	Below LOD	Below LOD	0.49	0.93	0.15	0.72	0.23	0.057	0.19	0.032	0.16	0.034	0.081	0.023	0.099	0.019	0.12	0.0096	Below LOD	0.086	0.12	0.038
C04-3	0.69	68	1000	220	3100	4.5	0.52	-	0.34	14	0.91	43	6.6	380	0.66	9.3	0.11	0.86	Below LOD	1.2	0.39	0.97	0.026	Below LOD	0.016	0.53	1	0.16	0.68	0.24	0.049	0.27	0.034	0.15	0.034	0.1	0.021	0.11	0.02	0.13	0.0085	Below LOD	0.079	0.097	0.043
C04-4	0.73	72	1200	230	3000	4	0.75	-	0.37	13	0.99	42	5.9	380	0.54	8.5	0.22	0.86	Below LOD	1.4	0.33	1	0.024	Below LOD	0.0072	0.51	1	0.19	0.73	0.24	0.057	0.24	0.029	0.15	0.035	0.099	0.023	0.11	0.023	0.15	0.0085	Below LOD	0.081	0.13	0.036
C05-1	1.2	86	1800	250	4800	Below LOD	20	-	0.95	19	2.4	3.7	15	760	0.8	5.1	0.35	1.2	0.14	3.1	0.25	0.97	0.012	0.013	0.16	0.12	0.38	0.11	0.71	0.29	0.067	0.19	0.029	0.14	0.025	0.068	0.012	0.06	0.0087	0.12	0.0034	Below LOD	0.12	0.064	0.011
C05-2	0.58	76	1200	180	3200	4	1.1	-	0.71	12	2	2.4	12	580	0.53	3.8	0.16	0.8	Below LOD	2.3	0.15	0.48	0.0051	Below LOD	0.039	0.097	0.25	0.078	0.39	0.24	0.043	0.16	0.024	0.086	0.017	0.046	0.01	0.04	0.0072	0.073	Below LOD	Below LOD	0.087	0.026	0.0075
C05-3	0.55	68	1300	210	3700	3	1	-	0.76	13	2.4	3.1	13	580	0.7	3.8	0.12	0.95	Below LOD	2.9	0.16	0.52	0.0046	Below LOD	0.03	0.094	0.32	0.086	0.41	0.21	0.045	0.16	0.02	0.085	0.018	0.046	0.0088	0.042	0.0073	0.068	Below LOD	Below LOD	0.086	0.028	0.0078
C05-4	0.52	71	1300	170	3400	3.2	1.2	-	0.73	13	2.2	2.7	9.8	560	0.66	4	0.13	0.86	Below LOD	2.5	0.13	0.58	0.0043	Below LOD	0.041	0.098	0.31	0.081	0.46	0.19	0.048	0.18	0.025	0.094	0.02	0.045	0.0095	0.046	0.0059	0.088	0.0012	Below LOD	0.088	0.027	0.0071
C05-5	0.46	73	1300	200	3400	3.2	3	-	0.7	14	2.2	3	10	570	0.62	4.7	0.17	0.82	0.027	2.8	0.14	0.49	0.0049	Below LOD	0.24	0.1	0.28	0.07	0.45	0.2	0.048	0.19	0.023	0.1	0.019	0.047	0.0096	0.036	0.0075	0.08	0.0012	Below LOD	0.081	0.034	0.0079
S01B1-1	0.2344	265.965	4007.87	466.337	48.5605	14.282	15.2544	10082.3	3.0835	129.464	9.7813	163.848	12.5595	1203.77	2.0192	26.7565	2.398	3.3899	0.1372	8.3677	1.085	2.9119	0.0368	0.0321	0.7498	0.5186	2.4176	0.5251	3.6081	1.2193	0.1588	0.5357	0.0732	0.2925	0.0372	0.106	0.0226	0.11	0.0133	0.1743	0.0099	0.0209	0.1212	0.283	0.0269
S01B1-2	0.5916	29.5171	1380.24	248.328	62.9458	13.0875	12.264	3201.77	1.5633	49.0392	5.838	204.821	20.3294	723.093	1.1727	20.1378	3.4317	4.021	0.1909	2.9908	0.768	1.5882	0.0358	0.0477	0.5067	0.4423	0.9178	0.3173	1.4815	1.5642	0.25	0.5155	0.0506	0.36	0.0825	0.0819	0.0337	0.1139	0.0159	0.171	0.0093	0.0227	0.1223	0.1248	0.0101
S01B1-3	0.6235	35.9512	1138	105.362	78.769	17.2455	69.6052	1848.67	1.0402	34.4561	2.1518	85.146	14.4785	864.619	1.0088	33.2952	3.025	3.4515	0.8799	0.868	0.7071	1.3881	0.0595	0.0864	1.0787	0.3362	0.5419	0.089	1.6227	0.8709	0.1318	0.5299	0.069	0.3024	0.0744	0.216	0.0226	0.1705	0.0191	0.1489	0.016	0.0307	0.1825	0.1228	0.024
S01B1-4	0.2331	23.5485	1194.69	236.522	48.1164	6.7563	96.0223	2420.41	0.8891	52.3666	2.6093	114.798	9.3218	746.245	0.6857	17.0983	0.5972	1.8735	0.8273	2.9035	0.2475	1.3419	0.0511	0.0416	2.9066	0.1998	0.781	0.1989	1.1589	0.4608	0.095	0.3615	0.0398	0.2218	0.0271	0.1111	0.0158	0.0899	0.0164	0.1084	0.008	0.02	0.0532	0.1849	0.0294
S01B2-1	0.3575	125.25	1526.52	455.356	54.2526	8.9756	365.941	2148.93	1.1096	71.7857	3.1198	101.208	16.8547	744.697	0.5024	12.7713	1.042	1.6875	4.4342	4.3382	0.4708	2.4233	0.1964	0.1742	10.1748	0.304	0.9966	0.284	1.4265	0.6119	0.0925	0.3543	0.0585	0.2204	0.0418	0.0817	0.0189	0.0862	0.0236	0.207	0.0194	0.0857	0.3588	1.1037	0.1485
S01B2-2	0.3418	142.218	2077.32	409.627	44.7946	10.218	17.3111	6089.83	2.3498	100.776	7.1906	242.664	9.838	1098.93	1.6976	25.6151	2.0302	3.5916	0.2401	7.5293	0.8917	2.0479	0.0511	0.0353	2.7757	0.4143	1.8345	0.4202	2.9117	1.0719	0.1818	0.5232	0.0616	0.2667	0.0481	0.1115	0.0144	0.0912	0.0139	0.1618	0.0036	0.0144	0.0906	0.2324	0.0118
S01B2-3	0.6049	211.841	3497.27	473.596	52.0946	9.9964	127.65	6838.76	1.9515	64.4946	7.5663	161.185	11.2894	799.947	0.7582	40.1962	7.1604	5.5456	1.7321	4.4919	1.0577	3.0102	0.114	0.1582	3.6889	0.3239	2.0733	0.3901	2.7871	1.07	0.0511	0.6542	0.0623	0.2082	0.0711	0.1503	0.02	0.1027	0.027	0.1661	0.022	0.0673	0.1101	0.3684	0.0413
S01B2-4	0.3414	170.131	1423.19	389.765	48.9074	9.7247	10.5628	5532.7	1.7295	64.0747	6.7413	180.907	8.9914	904.032	1.1052	30.2382	5.7216	2.8208	0.2057	7.5733	0.7019	2.1024	0.032	0.0441	0.3148	0.3616	1.644	0.3767	2.584	0.88	0.1914	0.4538	0.0558	0.3485	0.0416	0.1092	0.016	0.0939	0.0111	0.2047	0.003	0.017	0.1081	0.1258	0.0219
S01B2-5	0.406	63.9045	1184.93	73.4767	88.8642	14.1904	3.8595	2013.48	1.1741	31.4772	1.9422	112.765	10.6861	934.866	1.2876	20.1402	0.7411	2.9901	0.0651	1.3704	0.3896	0.8137	0.0409	0.0275	0.1445	0.1726	0.4357	0.1535	1.0452	0.5606	0.1605	0.4811	0.0614	0.2727	0.0487	0.1135	0.0179	0.1303	0.0161	0.186	0.0081	0.0195	0.1149	0.0585	0.0185
S01B3-1	0.4951	10.6497	2910.09	11.7185	60.333	25.7468	39.9792	121.568	0.4539	5.5305	0.269	11.6953	16.9019	1877.59	1.5709	83.297	0.8382	5.9156	0.4613	0.1245	0.074	0.2454	0.0481	0.0563	0.5624	0.0921	0.0299	0.0108	0.0296	0.0466	0.0091	0.0322	0.0046	0.0366	0.0064	0.0284	0.0062	0.0483	0.0093	0.0248	0.007	0.0304	0.083	0.062	0.0101
S01B3-2	0.6303	34.3837	1107.71	93.2492	46.2048	16.8828	85.4697	2798.19	1.0404	80.9388	4.7314	125.25	15.487	963.487	1.0956	15.1993	1.4746	3.632	0.9748	1.4768	0.3987	1.096	0.1066	0.1106	4.0643	0.2373	0.7236	0.3154	2.2846	0.453	0.1643	0.6822	0.0646	0.2626	0.0501	0.1559	0.0451	0.1853	0.0276	0.1956	0.0133	0.0386	0.1295	0.426	0.0818
S01B3-3	0.425	27.4321	1736.48	221.71	44.9346	5.4672	78.658	3933.55	1.8597	51.9868	2.5559	91.3007	15.0359	1198.72	1.5521	29.976	4.2418	3.1634	0.9038	1.2519	0.3788	1.2913	0.0614	0.0789	1.9359	0.3247	0.4185	0.1243	0.8965	0.6708	0.1053	0.3595	0.0553	0.2086	0.0491	0.1167	0.0244	0.1157	0.0204	0.1675	0.0099	0.024	0.1477	0.2946	0.0423
S01B3-4	0.7627	44.7505	911.687	165.491	48.0562	6.9187	11.441	3408.18	1.1084	55.0111	2.775	100.052	15.0619	652.247	1.0983	17.9786	0.7624	2.1988	0.195	3.534	0.3185	0.7054	0.0212	0.0346	0.2141	0.1659	0.4425	0.3228	0.9542	0.5276	0.0639	0.4934	0.0933	0.1865	0.0258	0.1352	0.0257	0.1232	0.0213	0.1746	0	0.0138	0.0777	0.067	0.0162
S01B3-5	0.5144	44.7703	1052.58	234.372	99.0703	52.6316	98.289	2870.33	1.9637	135.664	4.3554	98.3687	10.5718	777.528	1.2571	39.0037	3.2025	2.2959	1.6381	3.3542	0.7486	3.6308	0.1204	0.0621	1.448	0.7329	1.8588	0.3298	2.6543	1.1713	0.2214	0.5533	0.1324	0.5086	0.0837	0.2437	0.0392	0.2544	0.0285	0.3177	0.0132	0.0403	0.1792	0.3642	0.0493
S01B4-1	0.6431	109.624	1604.46	209.194	51.3551	15.155	125.218	2089.54	1.7419	55.9034	3.2489	157.137	14.426	764.965	0.8426	21.0602	20.6562	2.7916	1.268	2.7936	0.4469	2.5374	0.1409	0.4405	4.3765	0.2215	0.9597	0.2555	1.46	0.3596	0.1992	0.4945	0.0459	0.21	0.0232	0.142	0.0191	0.0948	0.0324	0.1503	0.0211	0.0754	0.1624	0.4261	0.0746
S01B4-2	0.3825	68.8887	2521.34	265.589	51.4501	9.359	149.335	2908.13	0.8931	42.7888	2.7615	134.618	11.5965	932.167	1.1417	19.734	0.6986	2.7309	2.0572	2.3179	0.2644	1.3558	0.0908	0.0975	3.3545	0.1891	0.7561	0.2042	1.0823	0.3532	0.0805	0.3153	0.029	0.1228	0.0251	0.0677	0.0178	0.0743	0.0122	0.1014	0.0075	0.0535	0.1461	0.444	0.0624
S03-1	0.36	25	7400	380	12000	110	95		0.57	32	3.8	200	55	2700	3.8	48	8.8	4.7	2.1	1.2	0.073	1.2	0.04	0.62	2.2	0.12	0.31	0.053	0.26	0.11	0.018	0.055	0.0084	0.04	0.0089	0.029	0.0053	0.038	0.0065	0.046	0.005	0.066	0.11	0.27	0.055
S03-3	1.2	380	1500	2900	6200	640	1000		1.2	200	8.9	4400	170	630	0.79	18	6.2	3.7	10	16	1.6	15	0.56	0.35	48	4.6	13	2	8.7	2.2	0.29	0.98	0.11	0.42	0.083	0.24	0.038	0.21	0.034	0.61	0.043	0.92	1.6	4.5	0.43
CZ15-1_1*	0.642622	37.9829	1779.23	163.667	-	105.615	3.79431	1938.67	-	73.5304	2.5153	1.44679	22.5646	2738.41	0.825595	2.64361	0.285418	1.61756	0.0615837	3.17571	0.540703	2.15075	0.0161507	0.0221361	0.0497035	1.2149	3.41434	0.371335	2.28982	0.560743	0.163989	0.548797	0.065057	0.23037	0.0442442	0.0839641	0.0291945	0.0921209	0.0149241	0.27567	0.00598749	-	0.0832137	0.150867	0.0178867
CZ15-1_2*	0.638308	50.747	1742.64	175.649	-	6.81669	8.49178	1826.76	-	75.3394	2.49556	2.04514	22.5601	2982.02	0.770122	3.57449	0.311882	2.04011	0.191548	2.84896	0.43292	2.3628	0.025847	0.0070541	1.13049	0.303596	0.751998	0.223141	0.969562	0.689028	0.12712	0.468071	0.0673806	0.229946	0.0452718	0.204414	0.0324935	0.211861	0.0219054	0.183678	0.00377932	-	0.0796468	0.0610213	0.0128444
CZ15-1_3*	0.96947	93.1128	2319.94	264.011	-	6.79772	79.7775	1326.98	-	51.289	2.20413	65.6389	16.4892	2108.5	0.529497	9.30913	0.493202	1.10481	0.737541	3.33131	0.228018	1.10074	0.0578966	0.0366945	3.04104	0.176243	0.474155	0.103631	0.68148	0.22162	0.059365	0.221523	0.027862	0.110788	0.0247061	0.0579507	0.0119008	0.0549292	0.00825749	0.0840953	0.00460117	-	0.110736	0.154373	0.0304528
CZ15-2_1*	0.535974	48.7306	1937.35	111.198	-	85.732	99.2113	2454.63	-	86.1478	1.5566	1.89453	23.7813	2689.22	0.714415	3.58653	0.368634	2.8776	0.788242	2.67727	0.971596	4.27902	0.147685	0.0555431	1.57721	1.84967	4.97683	0.721522	1.97773	1.06079	0.182736	0.655227	0.106972	0.370824	0.0527375	0.145986	0.0301682	0.168276	0.0335953	0.220351	0.0161164	-	1.05591	0.638481	0.131141
CZ15-2_2*	1.02482	135.2	1921.5	416.289	-	27.0024	310.419	1824.68	-	90.1312	1.76528	32.2968	19.2328	2507.1	0.538104	5.4095	2.08043	1.55805	2.63206	8.46487	0.606345	3.72799	0.183336	0.150067	9.34119	0.682828	1.70721	0.263843	1.7515	0.526385	0.0995851	0.386209	0.0532751	0.202547	0.0422162	0.0921794	0.0166349	0.0876628	0.0157545	0.240719	0.0159663	-	0.429026	0.665463	0.126615
CZ15-2_3*	0.65331	52.9673	1439.06	0.06724	-	4.55069	5.01276	1898.41	-	29.2274	1.48498	40.379	17.178	701.326	0.38739	4.53874	0.29745	0.78437	0.10397	2.51032	0.20172	0.52508	0.00632	0.01391	0.53879	0.09062	0.45951	0.07572	0.49973	0.24903	0.04588	0.20206	0.02928	0.0907	0.02182	0.05554	0.01221	0.0371	0.00959	0.0758	0.0026	-	0.05769	0.01774	0.00575
CZ15-2_4*	1.11779	95.4355	1720.42	0.07049	-	3.41207	23.0613	1968.94	-	28.3389	1.57722	73.4043	18.2415	722.109	0.69881	10.8268	0.45783	0.719	0.24096	2.53705	0.11018	0.70756	0.02246	0.02956	0.10119	0.08317	0.2871	0.06188	0.39633	0.2147	0.0454	0.19992	0.02163	0.07904	0.0187	0.03956	0.00848	0.04041	0.00669	0.07561	0.00544	-	0.06806	0.07399	0.01356
CZ15-13 Cpx1	19.8571	4715.2	115256	10256	250637	56.1988	53.0867	134361	29.3037	1816.55	130.98	2958.91	1040.51	37903.4	37.3627	469.94	2.1406	45.6368	<0.0106	163.859	7.4675	19.9511	0.0269	<0.0054	0.2079	3.8805	17.6858	3.6199	21.4823	5.9615	1.1392	3.9844	0.4326	2.0244	0.3096	0.682	0.0784	0.4438	0.0617	1.113	0.0014	<0.0022	0.8765	0.1517	0.0192
CZ15-13 Cpx2	37.3201	5979.09	110504	14347.2	248265	87.6463	59.0826	133035	35.3226	2546.84	185.669	2806.33	1044.8	41056	37.9602	481.051	3.759	52.521	<0.0099	187.999	9.7675	36.8039	0.0448	<0.0051	0.1977	6.0158	25.989	5.2911	30.3634	8.2023	1.5426	5.3979	0.5945	2.6349	0.4112	0.8972	0.1009	0.5926	0.0675	2.0769	0.0068	<0.0022	1.0628	0.2864	0.0267
CZ15-13 Cpx3	45.6646	5948.13	110996	14295.6	248380	87.7644	58.0183	132156	34.4247	2498.59	182.006	2996.09	1058.92	41138.4	38.1179	478.172	4.7223	52.5371	<0.0095	178.466	9.625	35.1692	0.0524	<0.0052	0.2131	5.6408	24.506	5.016	28.7504	7.6966	1.5467	5.1155	0.5541	2.5616	0.3824	0.8721	0.1019	0.5866	0.0746	2.0413	0.007	<0.0021	1.0026	0.27	0.0315
CZ15-13 Cpx4	18.2036	6732.5	109180	18407.2	246492	184.774	55.2115	126078	35.0925	3667.45	218.529	1706.68	1155.71	46000.4	40.404	475.956	2.8096	56.8154	0.0259	167.297	13.3577	61.7687	0.1609	<0.0057	0.2844	7.3943	32.3897	6.6244	38.3749	10.2936	1.9326	6.9438	0.7636	3.4822	0.5435	1.2446	0.1297	0.7626	0.0963	3.1366	0.0309	0.0029	1.0299	0.6679	0.0541
CZ15-13 Cpx5	26.4593	6227.02	108761	15317.7	248007	62.5258	61.596	133404	34.2565	2439.75	174.907	2095.28	1101.21	42693	37.5869	414.681	3.5568	51.1317	0.0671	188.829	9.6156	30.5948	0.0496	0.0069	0.4274	5.0273	22.1596	4.5411	26.558	7.1018	1.4622	4.9366	0.5186	2.6051	0.4131	0.9133	0.0978	0.5995	0.0794	1.5371	0.0072	<0.0024	0.9558	0.2495	0.0305
SLP15-1_1*	0.240478	18.6869	2319.91	45.2164	-	35.2512	1.37562	1806.42	-	44.1902	1.9589	26.5893	17.9238	1725.33	0.647903	3.5993	0.373559	1.04356	0.0246134	3.87864	0.348005	0.369599	0.0174699	0.0171782	0.102422	0.336987	1.0887	0.291714	1.29609	0.6765	0.144282	0.805655	0.0393067	0.23316	0.0349482	0.055905	0.0233551	0.160764	0.0166585	0.0516087	0.00371192	-	0.0737174	0.166401	0.0280275
SLP15-2_1*	0.134435	11.7159	2090.57	51.7794	-	8.44078	3.80772	1777.13	-	89.3164	1.90539	62.7253	29.8059	2060.86	0.6847	3.4465	0.336555	1.47487	0.0394655	3.48818	0.654642	0.975417	0.0201012	0.0362255	0.0697816	0.31017	1.30561	0.280815	1.44337	0.659208	0.205151	0.628125	0.0590051	0.286902	0.0531452	0.138491	0.0325364	0.117864	0.0217364	0.204606	0.0057321	-	0.0837484	0.0818033	0.0168498
SLP15-2_2*	0.18825	17.5237	2121.41	0.06577	-	6.70146	1.46839	2875.29	-	73.9227	2.1403	47.0259	24.3896	935.127	0.79966	4.02018	0.15663	1.05329	0.04068	2.99146	0.3771	0.699	0.00995	0.01349	0.09791	0.2001	0.95847	0.21094	1.40077	0.46011	0.09939	0.30134	0.03665	0.14388	0.02794	0.07219	0.01279	0.06847	0.01359	0.08374	0.00177	-	0.04202	0.03359	0.00944
SLP15-2_3*	0.16337	17.6379	1036.2	0.07081	-	9.09725	0.90285	2194.53	-	51.9602	1.41607	108.136	23.7965	909.768	0.38001	5.46177	0.13916	0.88488	0.02677	4.26807	0.51236	0.67116	0.01086	0.01711	0.03275	0.27387	1.17444	0.30591	1.58584	0.61038	0.11558	0.3529	0.04118	0.18561	0.028	0.08048	0.01495	0.07673	0.01458	0.09353	0.00303	-	0.03795	0.03217	0.00919
SLP15-3_1*	0.2354	18.9426	1145.52	74.7349	-	3.0871	7.3837	1796.49	-	47.3072	1.657	44.3898	9.8539	694.098	0.4226	10.4712	1.0791	1.0409	0.2728	1.4704	0.3902	0.5838	0.0268	0.0336	0.0855	0.142	0.4607	0.137	0.7798	0.2777	0.0575	0.3503	0.023	0.1975	0.0238	0.0715	0.0139	0.0478	0.0081	0.0741	0.0048	-	0.0308	0.0705	0.0129
SLP15-3_2*	0.2562	41.1823	1437.06	142.288	-	4.1011	56.2258	2425.48	-	56.4198	1.8945	58.677	9.463	776.615	0.5196	7.6594	0.5694	1.5398	0.7522	1.0965	0.2125	1.2626	0.0757	0.0378	1.0185	0.1371	0.5705	0.1332	0.7324	0.3138	0.0922	0.2979	0.0268	0.1137	0.0237	0.0632	0.0128	0.0832	0.0056	0.0881	0.0051	-	0.1753	0.2504	0.03
SLP15-3_3*	0.24	22.9437	1076.31	55.1317	-	18.8403	20.5581	2411.09	-	61.0055	2.5708	138.582	16.2479	812.852	0.8839	15.2629	1.3569	2.7069	0.532	1.3506	0.3532	1.0758	0.047	0.0465	0.5107	0.2948	0.9023	0.216	1.1932	0.6215	0.086	0.3079	0.0351	0.2186	0.0357	0.0994	0.0173	0.0704	0.0235	0.1307	0.0167	-	0.0874	0.5185	0.0196
																									0.006
																									48
																									1.75426
