# Supplementary material for: Carbonate- and silicate-metasomatized mantle beneath Himalayan-Tibetan orogenic belt
Source: Research Square preprint supplement (doi:10.21203/rs.3.rs-6729968/v1), 2025-06-02
Supplement: Supplementary file 3 [file ea89e951e81115a1324b0792.xlsx]

## Sheet: Sheet3
Sample No.	C01	C06	C07	C05	C03	C02	S01B1	S07	S02	S04	S05	S06	C18-01-45	CZ-07	CZ-08	CZ-09	CZ-01-1	CZ20	XR01-1	XR01-3	XR02-1	G8	C10	C25	CZ10-1-1	CZ10-1-2	CZ10-1-3	CZ10-1-5	CZ10-1-6	CZ10-1-7	CZ10-1-8	S-1	SLP15-12	SLP-04	SLP-11	SLP-08	SLP15	SLP1302	SLP1308	99-C15	XB-24	SL0618	SL0619	SL0620	SL0621	SL0622	SL0623	SL0624	SL0625
Classification	Mantle xenolith	Mantle xenolith	Mantle xenolith	Mantle xenolith	Mantle xenolith	Mantle xenolith	Mantle xenolith	Mantle xenolith	Mantle xenolith	Mantle xenolith	Mantle xenolith	Mantle xenolith	Host rock of OPG	Host rock of OPG	Host rock of OPG	Host rock of OPG	Host rock of OPG	Host rock of OPG	Host rock of OPG	Host rock of OPG	Host rock of OPG	Host rock of OPG	Host rock of OPG	Host rock of OPG	Host rock of OPG	Host rock of OPG	Host rock of OPG	Host rock of OPG	Host rock of OPG	Host rock of OPG	Host rock of OPG	Host rock of ORG	Host rock of ORG	Host rock of ORG	Host rock of ORG	Host rock of ORG	Host rock of ORG	Host rock of ORG	Host rock of ORG	Host rock of ORG	Host rock of ORG	Host rock of ORG	Host rock of ORG	Host rock of ORG	Host rock of ORG	Host rock of ORG	Host rock of ORG	Host rock of ORG	Host rock of ORG
Rock Type	OPG-Websterite	OPG-Websterite	OPG-Websterite	OPG-Websterite	OPG-Websterite	OPG-Websterite	ORG-Ol-Websterite	ORG-Lherzolite	ORG-Ol-Websterite	ORG-Harzburgite	ORG-Harzburgite	ORG-Ol-Websterite	Ultrapotassic rock	Ultrapotassic rock	Ultrapotassic rock	Ultrapotassic rock	Ultrapotassic rock	Ultrapotassic rock	Ultrapotassic rock	Ultrapotassic rock	Ultrapotassic rock	Ultrapotassic rock	Ultrapotassic rock	Ultrapotassic rock	Ultrapotassic rock	Ultrapotassic rock	Ultrapotassic rock	Ultrapotassic rock	Ultrapotassic rock	Ultrapotassic rock	Ultrapotassic rock	Ultrapotassic rock	Ultrapotassic rock	Ultrapotassic rock	Ultrapotassic rock	Ultrapotassic rock	Ultrapotassic rock	Ultrapotassic rock	Ultrapotassic rock	Ultrapotassic rock	Ultrapotassic rock	Ultrapotassic rock	Ultrapotassic rock	Ultrapotassic rock	Ultrapotassic rock	Ultrapotassic rock	Ultrapotassic rock	Ultrapotassic rock	Ultrapotassic rock
Age (Ma)	-	-	-	-	-	-	-	-	-	-	-	-	-	11.7	11.7	11.7	11.7	-	-	11.5 ± 0.2	-	10.94	10.94	10.94	-	-	-	-	-	-	-	-	-	16.3	16.3	17.7	-	16.97	16.97	16.97	16.97	-	-	-	-	-	-	-	-
Latitude	31.3027°	31.3027°	31.3027°	31.3027°	31.3027°	31.3027°	31.3027°	31.3027°	31.3027°	31.3027°	31.3027°	31.3027°	31.3027°	30°4.3′	30°4.3′	30°4.3′	30°4.3′	31.3027°	30°4.3′	30°4.3′	30°2.4′	-	-	-	-	-	-	-	-	-	-	31.3027°	31.3027°	31°17.8′	31°17.8′	31°17.8′	31°17'45.10"	31°26′7.37″	31°22′6.24″	31°18′6.13″	31°20′13.42″	31°17.8′	31°17.8′	31°17.8′	31°17.8′	31°17.8′	31°17.8′	31°17.8′	31°17.8′
Longtitude	83.0185°	83.0185°	83.0185°	83.0185°	83.0185°	83.0185°	83.0185°	83.0185°	83.0185°	83.0185°	83.0185°	83.0185°	83.0185°	86°30.8′	86°30.8′	86°30.8′	86°30.8′	83.0185°	86°30.8′	86°30.8′	86°31.6′	-	-	-	-	-	-	-	-	-	-	83.0185°	83.0185°	82°58.5′	82°58.5′	82°58.5′	82°58'28.29"	82°44′20.23″	82°40′10.76″	82°44′50.35″	82°52′37.16″	82°58.5′	82°58.5′	82°58.5′	82°58.5′	82°58.5′	82°58.5′	82°58.5′	82°58.5′
Literature	This study	This study	This study	This study	This study	This study	This study	This study	This study	This study	This study	This study	This study	Li et al. (2021)	Li et al. (2021)	Li et al. (2021)	Li et al. (2021)	This study	Zhao et al. (2009)	Zhao et al. (2009)	Zhao et al. (2009)	Guo et al. (2013)	Guo et al. (2013)	Guo et al. (2013)	Tian et al. (2017)	Tian et al. (2017)	Tian et al. (2017)	Tian et al. (2017)	Tian et al. (2017)	Tian et al. (2017)	Tian et al. (2017)	This study	This study	Li et al. (2021)	Li et al. (2021)	Li et al. (2021)	Li et al. (2020)	Guo et al. (2015)	Guo et al. (2015)	Guo et al. (2015)	Guo et al. (2015)	Zhao et al. (2009)	Zhao et al. (2009)	Zhao et al. (2009)	Zhao et al. (2009)	Zhao et al. (2009)	Zhao et al. (2009)	Zhao et al. (2009)	Zhao et al. (2009)
Major elements
SiO2	50.46	49.8636	49.1651	48.8751	46.4486	47.2905	50.71	50.77	49.82	48.15	46.24	49.185	56.3745	55.65	55.7	55.59	59.4	59.75	59.4	52.22	52.47	57.81	56.14	57.18	55.78	55.54	56.3	56.34	56.13	56.22	56.35	56.73	56.02	56.37	56.2	60.61	56.2	56.8	55.67	55.45	56.78	58.9	58.84	59	54.6	57.9	56.4	56.8	56.7
TiO2	0.455	0.67949	0.895548	1.20836	0.67338	0.696725	0.275	0.243	0.31	0.327	0.335	0.376	1.38411	1.369	1.288	1.347	0.99	1.064	0.99	1.41	1.51	1.12	1.43	1.62	1.01	1.02	1.01	1.01	1.01	1.01	1	1.481	1.371	1.375	1.364	1.22	1.364	1.54	1.56	1.66	1.52	1.3	1.35	1.3	1.4	1.4	1.3	1.4	1.4
Al2O3	7.101	7.9001	5.32172	6.73422	10.062	10.3773	3.078	2.995	2.455	2.409	3.076	2.938	14.7238	14.55	14.43	14.47	13.76	13.23	13.76	11.51	12.76	13.67	12.57	12.09	12.6	12.38	12.59	12.56	12.48	12.46	12.65	12.19	12.46	12.54	12.25	14.53	12.25	12.03	13.7	13.48	11.47	13.9	14	13.7	13	14.4	12.1	12.1	13.5
FeOT	6.02236	6.48738	5.83516	6.23987	9.36332	8.66102	7.46294	7.37296	7.95243	8.66147	9.016	8.87743	5.88321	6.13754	5.67774	5.8397	4.70595	4.74195	4.70595	6.2896	5.46179	5.61475	5.82171	4.9669	4.58299	4.54349	4.44976	4.42101	4.45785	4.46615	4.41126	6.45427	5.92068	6.01021	5.90431	5.18285	5.90431	5.33581	6.24461	5.71373	5.3808	5.12886	5.06587	4.9489	6.11864	5.21884	5.75872	5.8487	5.93868
Fe2O3	-	-	-	-	-	-	-	-	-	-	-	-	-	-	-	-	-	-	-	-	-	-	-	-	3.26	2.8	3.64	3.36	3.65	2.56	2.57	-	-	-	-	-	-	-	-	-	-	-	-	-	-	-	-	-	-
FeO	-	-	-	-	-	-	-	-	-	-	-	-	-	-	-	-	-	-	-	-	-	-	-	-	2.16	2.53	1.67	1.89	1.67	2.66	2.59	-	-	-	-	-	-	-	-	-	-	-	-	-	-	-	-	-	-
MnO	0.116	0.124355	0.0892274	0.086365	0.14534	0.138725	0.135	0.135	0.129	0.276	0.332	0.147	0.09464	0.085	0.09	0.085	0.08	0.077	0.08	0.11	0.1	0.11	0.14	0.14	0.09	0.09	0.09	0.09	0.09	0.09	0.09	0.101	0.097	0.095	0.106	0.06	0.106	0.09	0.15	0.11	0.13	0.1	0.11	0.1	0.1	0.1	0.1	0.1	0.1
MgO	11.81	11.3764	18.2384	18.3169	17.114	16.7477	33.81	34.89	33.56	35.92	35.87	34.3	4.92583	4.25	4.2	4.24	3.81	4.44	3.81	10.99	6.42	5.9	6.19	6.61	4.88	5.06	4.69	4.8	4.79	4.78	4.67	8.102	7.98	8.55	7.57	4.18	7.57	8.2	7.55	8.08	8.75	5.5	5.33	5.4	9	5.3	8.9	9.3	6.2
CaO	21.77	20.44	16.8304	15.2904	13.0376	13.3223	1.713	1.673	2.77	1.445	1.576	1.779	6.12703	5.999	6.29	6.34	4.68	5.83	4.68	6.06	6.17	6.44	6.85	6.75	7.76	7.88	7.49	7.51	7.58	7.62	7.34	5.018	5.09	5.43	5.2	4.71	5.2	4.83	5.3	5.86	4.85	4.9	4.8	4.8	5.5	4.9	5.2	5.1	5
Na2O	0.802	0.278	0.579569	0.627085	0.7912	0.86025	0.046	0.144	0.079	0.068	0.074	0.124	2.68996	2.679	2.54	2.54	3.11	2.42	3.11	2.04	1.87	2.68	2.14	2.48	1.79	1.98	2	1.98	1.98	1.98	2.03	1.908	1.86	1.78	1.77	2.75	1.77	2.13	2.71	1.9	2.29	2.5	2.45	2.2	1.7	2.5	1.6	1.7	2.2
K2O	0.35	1.10848	1.54715	2.21094	0.40936	0.507625	0.265	0.275	0.542	0.49	0.551	0.74	6.0424	6.143	6.12	6.11	7.41	7.05	7.41	6.14	8.03	5.29	7.16	6.49	7.96	7.85	8	8.06	7.93	7.94	8	6.102	5.99	5.86	5.8	4.66	5.8	7.29	5.61	6.47	6.96	5.6	5.67	5.9	5.9	5.7	5.9	5.9	5.7
P2O5	0.122	0.326655	0.057302	0.012767	0.02064	0.06045	0.059	0.143	0.12	0.067	0.101	0.107	0.8463	0.814	0.83	0.85	0.56	0.14	0.56	1.12	1.18	1.28	0.79	0.93	0.75	0.73	0.68	0.68	0.72	0.7	0.67	0.813	0.89	0.93	0.9	0.57	0.89	0.86	0.26	0.92	1.79	0.7	0.71	0.7	0.9	0.8	0.8	0.8	0.8
Total	99.679	99.3069	99.2094	100.297	99.1081	99.627	98.385	99.462	98.623	98.778	98.175	99.562	99.7469	98.36	98.9	98.62	99.56	99.3729	99.56	99.32	97.48	100.655	100.142	100.377	98.6833	98.4194	98.6953	98.6333	98.3843	98.5735	98.3225	99.618	99.26	100.6	99.04	100.31	97.9543	100.286	99.5746	100.274	101.201	99.8	99.83	99.9	99.7	99.5	99.5	99.8	99.8
Mg#	77.7561	75.7629	84.7829	83.9553	76.5153	77.5124	88.9815	89.4015	88.2664	88.0844	87.6419	87.3214	59.8792	55.2441	56.8706	56.4126	59.0696	62.5333	59.0696	75.6968	67.6927	65.1944	65.4614	70.346								69.1131	70.6102	71.7179	69.5626	58.9766	69.5626	73.2577	68.306	71.5971	74.3503	65.6539	65.2232	66.0444	72.3907	64.4162	73.3681	73.9204	65.047
Opx_Modal	0.15	0.21	0.242876	0.33	0.373091	0.41	0.6715	0.336597	0.570933	0.495068	0.421032	0.563872	-	-	-	-	-	-	-	-	-	-	-	-	-	-	-	-	-	-	-	-	-	-	-	-	-	-	-	-	-	-	-	-	-	-	-	-	-
Cpx_Modal	0.84	0.78	0.719791	0.66	0.590457	0.58	0.0627626	0.0655597	0.099501	0.0496646	0.0538541	0.063042	-	-	-	-	-	-	-	-	-	-	-	-	-	-	-	-	-	-	-	-	-	-	-	-	-	-	-	-	-	-	-	-	-	-	-	-	-
Ol_Modal	0.01	0.01	0.0373331	0.01	0.0364518	0.01	0.265737	0.597844	0.329566	0.455267	0.525114	0.373086	-	-	-	-	-	-	-	-	-	-	-	-	-	-	-	-	-	-	-	-	-	-	-	-	-	-	-	-	-	-	-	-	-	-	-	-	-
Trace elements
Li	26.5169	21.3096	24.44	21.5978	36.3541	32.5111	8.21364	10.6796	7.51416	9.55966	10.4913	12.5284	13.0899	-	-	-	-	-	37.6	16.4	15.9	-	-	-	42.1	44.5	43.9	45	46.1	45.7	42.2	10.6662	9.50695	-	-	-	-	-	-	-	-	-	-	-	-	-	-	-	-
Be	2.45493	4.19899	1.6992	2.13522	2.1501	1.76055	1.18721	1.46821	0.923049	0.924647	1.88824	1.31302	8.88941	8.26688	10	9	-	-	11.7	22.5	28.8	-	-	-	13.1	12.5	13.4	13.2	12.2	13	12.8	10.3994	11.1314	12	14	6.3	-	-	-	-	-	10.7	11.2	11.4	11.3	11.3	10.7	10.9	10.2
Sc	14.6166	22.5914	42.6409	34.1901	72.6783	70.0284	12.4932	14.5537	8.90386	11.3646	9.57078	12.2017	15.4594	15.1358	15.4	15.6	12.7	15.1358	12.7	18.6	17.1	18.47	16.39	18.63	17.3	19.8	20	20	19.9	21.3	20.8	15.2834	11.5835	17.3	17.6	14.08	17.6	18.2	16.4	19.8	16.3	14.6	14.48	14.4	18.7	14.8	17.7	17.3	17.8
Ti	2851.86	4122.06	5561.65	6577.57	4049.87	3908.49	1463.75	1690.83	1677.37	1697.77	1875.99	2245.54	8345.84	8876.13	7721.56	8075.26	5935.05	6378.68	5935.05	8452.95	9052.45	6714.4	8572.85	9711.9	6054.95	6114.9	6054.95	6054.95	6054.95	6054.95	5995	7808.08	7260.15	8243.12	8177.18	5261.41	8177.18	9232.3	9352.2	9951.7	9112.4	7793.5	8093.25	7793.5	8393	8393	7793.5	8393	8393
V	87.3581	150.2	193.817	234.378	281.62	273.468	69.4713	85.9167	53.5824	65.7941	62.0825	78.0437	144.709	146.21	127	127	75	146.21	75	125	114	136.23	151.79	131.47	107	117	116	113	108	115	109	132.478	107.229	127	133	107.55	133	112	127	172	183	114	112.76	112	138	110	128	130	130
Cr	453.344	113.854	53.9465	117.234	741.738	741.125	1972.79	2264.7	2509.77	1947.85	1542.16	2474.92	107.364	134.826	116	122	147	134.826	147	670	266	278.46	294.43	393.26	126	142	134	144	130	142	123	429.708	374.291	473	461	196	461	460	289	538	358	235	227	232	470	236	459	426	364
Mn	986.694	1063.99	687.684	646.16	1233.53	1122.92	1056.41	1218.03	1028.82	2464.44	6470.45	1241.76	818.318	-	-	-	-	-	-	-	-	-	-	-	-	-	-	-	-	-	-	732.782	707.295	-	-	-	-	-	-	-	-	-	-	-	-	-	-	-	-
Co	33.2962	32.8043	43.7213	42.5463	65.1735	63.4653	74.3755	91.1816	86.5431	125.313	156.364	92.857	20.8376	23.4336	20.5	19.6	43	23.4336	43	55	40	31.38	26.84	27.04	22.3	24.7	23.4	23.5	22.7	24.3	22.3	26.3047	25.751	28.5	28.9	19	28.9	31.9	33.4	40.5	39.2	23	23	21	33	23	33	31	28
Ni	263.555	204.454	304.308	209.877	124.811	201.527	1143.31	1159.13	1548.22	1776.03	1898.35	1554.88	69.1201	73.5439	74	75	83	73.5439	83	395	165	169.27	184.73	187.28	86.1	96.8	93.2	95.8	90.2	97.7	87.7	209.269	207.68	325	240	105.89	240	306	220	387	353	133	142.03	119	283	138	309	252	124
Cu	17.9218	14.7147	48.2747	45.7087	13.6148	13.6195	11.7718	13.4129	28.1498	24.5071	19.1014	26.8635	38.5507	98.0664	23	35	31	98.0664	31	42	41	61.84	58.31	35.87	43.2	49.2	48.4	46.5	45.1	51	49.3	43.5847	28.5023	50	34	33	34	40.5	23.6	42.2	66.6	23	25	24	29	33	42	34	34
Zn	84.2242	83.2868	139.274	62.7954	75.0179	60.2885	50.1518	71.2208	65.7021	73.7043	66.9723	80.6179	87.143	248.334	92	79	77	248.334	77	79	86	58.32	21.97	14.31	85.2	94.4	95.5	92.1	91.3	97.1	90.4	81.8155	71.2699	85	84	86	84	92.6	104	69.5	91.7	79	83	81	86	83	78	77	95
Ga	16.5623	17.1516	7.0978	8.04088	10.651	10.1118	4.55711	5.12458	3.51569	4.00327	4.85236	4.69513	22.4253	21.4521	20	21	21.4	21.4521	21.4	20.6	22.6	27.21	26.54	25.36	23.2	24.4	25.6	25.2	24.9	26.7	25.4	18.2086	19.4861	19	19	20.99	19	24	23.2	23.2	26.4	21.7	22.14	21.5	21	22.2	19.6	20.1	21.3
Ge	1.89547	2.04687	1.25405	1.55174	1.63558	1.54969	1.25234	1.35021	1.26598	1.23377	1.21209	1.29469	1.55795	1.51915	1.5	1.6	-	-	1.93	2.47	2.28	-	-	-	-	-	-	-	-	-	-	1.63858	1.44759	1.8	1.8	-	-	-	-	-	-	-	-	-	-	-	-	-	-
As	2.33194	1.43702	0.6928	1.08774	0.688995	1.61351	1.10404	1.41873	1.35009	1.23585	1.46143	0.988172	1.8699	2.73207	1	3	-	-	-	-	-	-	-	-	-	-	-	-	-	-	-	4.99534	2.17518	5	8	-	-	-	-	-	-	-	-	-	-	-	-	-	-
Rb	19.5509	89.3048	157.154	225.436	33.0491	32.6611	19.216	22.2129	54.8413	52.9096	121.55	81.7969	499.298	486.92	447	457	650	486.92	650	2518	873	725.4	938.3	498.4	761	750	803	781	737	778	764	517.385	421.276	453	503	391	503	928	503	867	709	494	497	533	389	469	499	583	507
Sr	227.047	382.028	174.246	182.005	54.966	75.6515	31.8355	32.7324	71.137	39.8542	108.753	59.8142	1282.15	1252.93	1222	1246	893	1252.93	893	1264	1057	636.7	879.4	676.1	1488	1500	1606	1562	1443	1612	1440	794.515	735.845	857	894	787	894	732	912	801	758	888	893	870	942	896	814	873	761
Y	24.6265	20.2273	6.0785	6.3803	8.99917	8.8906	2.43076	2.68801	2.71503	2.29135	4.26839	3.26348	26.5518	24.6792	24	22	27.8	24.6792	27.8	33.6	38.1	34.2	46.8	24.6	36.7	34.2	33.8	32.6	31.3	33.6	31.9	23.23	22.6356	24	25	20.4	25	33.4	24.4	18.5	36.9	25.2	24.8	25	29.5	27.2	26.2	27.2	28.2
Zr	186.68	247.26	43.92	53.1704	50.0078	43.5747	44.9152	46.39	40.1575	33.2274	76.0802	42.5299	585.995	492.306	466	481	484	492.306	484	679	809	838.1	481.2	412.7	521	488	527	478	464	497	477	582.142	483.526	525	548	381	548	722	618	637	784	527	528	519	568	534	540	562	517
Nb	1.96465	9.03056	1.6281	3.37139	1.53773	1.40299	1.55281	1.81669	2.36771	1.85447	4.17247	2.46904	28.7874	25.5818	22.5	23.6	30.2	25.5818	30.2	34.6	54.3	33.8	27.7	26.5	24.6	24.8	25	23.4	23.2	24.6	23.7	28.0666	24.0347	26.2	24.7	22.13	24.7	35.2	34.9	18.3	16.4	26.7	26.96	25.9	33.9	26.6	31.4	30.7	30.7
Mo	0.778951	1.33025	0.0852	0.370968	0.219201	3.33733	8.29518	8.02374	0.469271	0.508992	0.711974	0.48944	1.33473	2.24668	2	2	-	-	-	-	-	-	-	-	-	-	-	-	-	-	-	1.08248	0.822504	2	2	-	-	-	-	-	-	-	-	-	-	-	-	-	-
Cd	0.131116	0.156161	0.01584	0.0628041	0.0681107	0.0699033	0.0661157	0.0316856	0.042919	0.0547237	0.0756927	0.0419617	0.322735	0.532658	0.5	0.5	-	-	-	-	-	-	-	-	-	-	-	-	-	-	-	0.400618	0.110397	0.5	0.5	-	-	-	-	-	-	-	-	-	-	-	-	-	-
In	0.181121	0.219305	0.00153	0.107486	0.102243	0.0973821	0.0494549	0.0403669	0.0531118	0.0599222	0.0475986	0.0682961	0.130999	0.0947014	0.1	0.1	-	-	-	-	-	-	-	-	-	-	-	-	-	-	-	0.123223	0.0425094	0.1	0.1	-	-	-	-	-	-	-	-	-	-	-	-	-	-
Sn	7.58021	5.24849	3.343	4.04667	1.75702	1.91971	0.448522	0.519394	0.42277	0.499151	0.556657	0.61328	7.91788	9.07624	7	8	-	-	-	-	-	-	-	-	-	-	-	-	-	-	-	3.08395	2.8565	3	3	-	-	-	-	-	-	-	-	-	-	-	-	-	-
Sb	0.23564	0.071786	0.066105	0.13062	0.0996641	0.943998	0.0679069	0.0618189	0.0270803	0.0644275	0.310184	0.0466874	0.132754	0.111484	0.8	0.5	-	-	-	-	-	-	-	-	-	-	-	-	-	-	-	0.0473726	0.193265	0.4	0.5	-	-	-	-	-	-	-	-	-	-	-	-	-	-
Cs	1.46879	3.18305	6.972	8.46701	1.58036	1.48302	0.733982	0.842249	3.0735	3.25645	5.26496	5.06211	9.98133	12.2172	9.5	9.1	-	-	28.95	348.3	52.64	-	-	-	-	-	-	-	-	-	-	21.7607	44.4318	21.1	18.5	13.15	-	-	-	-	-	14.57	16.65	20.61	10.69	6.04	17.72	24.75	14.45
Ba	122.638	320.264	489.236	607.845	46.6142	88.5022	220.613	243.16	290.502	480.008	1065.99	400.87	1759.89	2151.38	1811	1792	1737	2151.38	1737	4044	2893	2619.5	1973.2	1785.4	2208	2182	2205	2189	2122	2277	2116	2028.06	1847.03	2094	2174	1692.19	2174	2795	2501	2113	2739	2542	2583.01	2504	2474	2549	2084	2310	2137
La	24.5559	39.1755	5.05729	7.19225	9.52978	8.45878	4.11548	4.11984	6.52397	4.64465	12.2404	6.41796	99.3968	108.165	105	103	112	108.165	112	146.6	128.4	142.4	131.6	102.7	144	131	136	130	129	140	129	94.7345	89.8269	96.2	102	83.7	102	104	101	90.2	84.1	124.6	126.2	119.9	104.1	125.8	97.4	102.8	98.6
Ce	63.3044	98.0763	14.5848	21.5755	26.5169	21.8046	10.3963	10.8309	19.2203	15.0437	37.4174	17.8567	216.748	244.732	235	229	243	244.732	243	386	335	365.3	327.8	241.8	319	286	304	290	295	308	289	244.796	216.328	249	264	185	264	289	244	237	225	311	307	288	271	307	258	266	232
Pr	8.37741	12.3743	3.245	3.42338	3.45516	2.82529	1.41596	1.51647	2.57092	1.75895	4.56163	2.44142	26.4972	31.2051	29.5	28.5	33.5	31.2051	33.5	59.1	52.7	50.7	46.3	34.1	37.2	34.2	36.3	34.4	34.5	37.4	34.9	32.7561	33.3521	34.2	36.5	25.2	36.5	46.5	33.5	34.9	33.2	42.7	43	39.7	37.8	42.7	36.1	37.8	32.8
Nd	35.2479	50.2088	16.7762	16.6984	14.5856	11.9418	6.53609	7.42076	12.0762	8.48723	20.9932	11.9894	114.42	123.528	115	110	136	123.528	136	269	239	206.5	182.5	139.3	149	140	146	141	139	151	139	154.356	165.414	149	162	107	162	227	149	161	152	178	177	171	169	180	162	168	142
Sm	7.57448	10.4143	4.11908	4.23143	3.21489	2.95011	1.51046	1.56142	2.70079	1.88908	4.42718	2.70149	19.6472	21.4441	19.8	19	24.7	21.4441	24.7	51.6	48.5	47.2	42.4	29.5	27.5	25.4	27.1	25.6	25	27.3	25.6	29.7211	26.7602	29.5	31.5	19.1	31.5	47.6	26.7	38.4	40.6	33	32.6	31	31.9	33	29.9	32.1	26.5
Eu	1.25033	1.71922	0.91063	0.867368	0.702259	0.686154	0.255371	0.274228	0.404171	0.287265	0.63608	0.422214	3.55981	3.92568	3.63	3.48	3.78	3.92568	3.78	7.52	6.8	6.11	5.55	3.39	4.84	4.31	4.63	4.27	4.59	4.75	4.37	4.43859	4.18206	4.41	4.85	3.24	4.85	6.55	3.77	6.18	7.06	5.31	5.29	5.07	5	5.39	4.52	4.96	4.15
Gd	5.85082	6.69912	3.27313	2.9434	2.37947	2.3435	0.88199	0.987977	1.32133	0.940436	1.96896	1.46348	9.99953	12.6583	11.6	10.9	15.7	12.6583	15.7	28.9	28	25.8	23.9	14.8	16	14.6	15.4	15.4	13.8	16.1	14.3	12.9566	13.6072	13.3	14.9	10	14.9	24.1	15.3	26.2	32.9	16.6	16.4	15.9	16	16.9	14.6	15.6	13.9
Tb	0.819388	0.842244	0.365828	0.346579	0.333327	0.342193	0.0991501	0.106631	0.137942	0.106358	0.215199	0.153499	1.21044	1.36887	1.18	1.14	1.66	1.36887	1.66	2.79	2.88	2.37	2.67	1.36	2.08	1.93	2.09	1.86	1.91	2.02	1.86	1.31956	1.437	1.27	1.4	1.04	1.4	2.38	1.61	2.52	2.37	1.57	1.57	1.51	1.58	1.59	1.45	1.53	1.39
Dy	4.30921	3.80014	1.5869	1.43707	1.77063	1.81523	0.440919	0.525292	0.488164	0.431368	0.741231	0.617729	4.46394	6.00607	5.7	5.27	7	6.00607	7	10.3	11	8.86	10.12	6.29	7.8	7.37	7.51	7.24	7.18	7.55	7.03	3.97	5.71696	5.5	5.85	4.5	5.85	8.36	6	6.84	7.92	5.9	5.8	5.7	6.4	6.1	5.9	6.2	5.9
Ho	0.909043	0.772355	0.24206	0.244261	0.364633	0.359772	0.0873826	0.0988438	0.101767	0.0869132	0.15737	0.123613	0.957229	0.969489	0.94	0.84	0.99	0.969489	0.99	1.28	1.44	1.39	1.53	0.95	1.23	1.09	1.14	1.1	1.06	1.18	1.11	0.904558	0.860727	0.88	1	0.78	1	1.29	0.97	0.78	1.22	0.9	0.88	0.87	1.07	0.96	0.96	0.99	0.97
Er	2.59383	2.08888	0.562159	0.583857	0.962052	0.9946	0.253147	0.278067	0.263353	0.24623	0.425801	0.321776	2.32316	2.36897	2.48	2.21	2.62	2.36897	2.62	3.39	3.67	2.94	3.64	2.14	3.37	2.95	3.06	2.99	2.84	3.2	2.96	2.21778	2.18813	2.31	2.62	1.98	2.62	2.97	2.32	1.92	2.78	2.26	2.22	2.21	2.7	2.31	2.48	2.59	2.52
Tm	0.371692	0.279334	0.0704	0.0614198	0.124303	0.125562	0.0339881	0.0398141	0.034025	0.0300995	0.0537269	0.0421405	0.300545	0.299802	0.304	0.276	0.3	0.299802	0.3	0.33	0.38	0.38	0.46	0.28	0.32	0.32	0.31	0.31	0.3	0.33	0.31	0.290036	0.339996	0.311	0.324	0.26	0.324	0.37	0.3	0.26	0.36	0.27	0.27	0.27	0.34	0.29	0.32	0.33	0.32
Yb	2.42796	1.84213	0.4038	0.402724	0.814634	0.825228	0.264169	0.28604	0.253121	0.250412	0.385589	0.315178	1.90172	1.80832	1.76	1.59	1.96	1.80832	1.96	2.15	2.4	2.31	2.68	1.77	1.91	1.7	2.01	1.84	1.73	1.93	1.86	1.82423	2.15678	1.84	1.91	1.57	1.91	2.18	1.8	1.68	2.29	1.69	1.73	1.63	2.19	1.78	1.88	2.03	1.94
Lu	0.37752	0.297449	0.055	0.0546392	0.110087	0.113523	0.038346	0.0428211	0.0342055	0.0372006	0.053849	0.0438836	0.270163	0.256057	0.252	0.241	0.29	0.256057	0.29	0.3	0.35	0.35	0.37	0.27	0.29	0.27	0.28	0.27	0.25	0.29	0.26	0.263937	0.289003	0.253	0.277	0.23	0.277	0.31	0.26	0.23	0.33	0.23	0.24	0.23	0.29	0.25	0.27	0.28	0.28
Hf	6.53898	7.01757	1.78035	1.87112	1.47798	1.42817	1.28755	1.48601	1.20464	0.9782	2.18608	1.16923	14.3083	14.3094	12.8	12	13.8	14.3094	13.8	19.6	25.1	21.6	13.9	12.9	13.3	12.6	14.3	12.9	12.5	13.9	13.1	15.0059	14.2669	13.4	14.1	9.8	14.1	20.6	17.9	9.03	20.3	14	14.1	13.5	15.7	13.9	14.7	15.3	13.9
Ta	0.313299	0.643365	0.12474	0.237929	0.154226	0.161511	0.104982	0.175413	0.160577	0.134513	0.250951	0.149082	1.72485	1.85157	1.45	1.33	2.13	1.85157	2.13	2.02	3.3	2.23	1.81	1.66	1.53	1.52	1.62	1.46	1.5	1.53	1.53	1.55477	1.4969	1.39	1.39	1.2	1.39	2.09	2.36	1.51	1.65	1.47	1.47	1.4	1.89	1.46	1.75	1.73	1.64
W	1.88158	1.58719	0.1908	0.632472	0.57308	23.887	0.150937	0.223044	0.459788	0.781055	2.62599	0.317122	4.3333	5.04161	1	1	-	-	-	-	-	-	-	-	-	-	-	-	-	-	-	3.64711	3.25133	1	1	-	-	-	-	-	-	-	-	-	-	-	-	-	-
Tl	0.0938971	0.31675	0.59625	0.813116	0.124155	0.137432	0.152774	0.173636	0.757784	0.992727	2.57735	0.958409	1.85657	1.53724	1.47	1.39	-	-	-	-	-	-	-	-	-	-	-	-	-	-	-	4.70199	19.0435	4.06	4.44	-	-	-	-	-	-	-	-	-	-	-	-	-	-
Pb	7.40798	17.939	6.3938	5.79955	4.40194	4.47462	3.33755	3.1759	4.63855	3.91666	7.75991	5.16148	52.4576	195.738	57	44	71	195.738	71	99	133	146.4	98.6	71.7	89.7	81.5	83.6	79.1	81.6	81.8	85.9	188.156	73.6508	56	55	36	55	78.9	89.2	71.1	79.7	57	62	58	56	68	49	50	44
Bi	0.517914	0.0712382	0.025	0.0394921	0.0430104	0.0557189	0.0234066	0.0483272	0.0376389	0.0270081	0.0226738	0.0406588	0.0658082	0.0894614	0.1	0.1	-	-	-	-	-	-	-	-	-	-	-	-	-	-	-	0.110968	0.804202	0.1	0.1	-	-	-	-	-	-	-	-	-	-	-	-	-	-
Th	4.24457	24.5113	0.71535	3.81052	4.40496	3.78442	6.31678	7.33154	11.5727	7.7481	21.342	9.92759	89.6368	82.1922	87.9	86.5	112.1	82.1922	112.1	239.4	242	138.7	123.3	149.3	110	101	116	103	102	113	107	163.299	135.277	170	178	105.23	178	299	131	212	289	179	178.91	171	189	178	174	188	147
U	0.741708	4.63328	0.11	0.639149	0.828921	0.691174	0.631989	0.656108	1.37701	0.944511	2.99931	1.27033	15.6798	14.196	15.1	14.9	27	14.196	27	33.89	41.13	21.9	21.8	16.5	6.93	7.48	6.63	6.28	6.86	6.13	8.3	21.4671	18.6423	21.5	23.3	13.25	23.3	40.6	15.6	36.2	41.2	20.76	19.94	20.74	21.82	20	21.68	23.65	19.22
Rb	19.5509	89.3048	157.154	225.436	33.0491	32.6611	19.216	22.2129	54.8413	52.9096	121.55	81.7969	499.298	382.653	441.867	407.612	-	-	-	-	-	-	-	-	-	-	-	-	-	-	-	517.385	421.276	367.997	458.591	-	-	-	-	-	-	-	-	-	-	-	-	-	-
Sr	227.047	382.028	174.246	182.005	54.966	75.6515	31.8355	32.7324	71.137	39.8542	108.753	59.8142	1282.15	962.648	1200.31	1162.91	-	-	-	-	-	-	-	-	-	-	-	-	-	-	-	794.515	735.845	785.161	814.246	-	-	-	-	-	-	-	-	-	-	-	-	-	-
Sr/Y	9.21962	18.8868	28.6659	28.5261	6.10789	8.50915	13.0969	12.1772	26.2012	17.3933	25.4786	18.3283	48.2885	50.7688	50.9167	56.6364	32.1223	50.7688	32.1223	37.619	27.7428	18.617	18.7906	27.4837	40.545	43.8596	47.5148	47.9141	46.1022	47.9762	45.1411	34.2021	32.5084	35.7083	35.76	38.5784	35.76	21.9162	37.377	43.2973	20.542	35.2381	36.0081	34.8	31.9322	32.9412	31.0687	32.0956	26.9858
Ba/La	4.99422	8.17509	96.7387	84.5139	4.89142	10.4628	53.6056	59.0217	44.5285	103.346	87.0877	62.4607	17.7057	19.8898	17.2476	17.3981	15.5089	19.8898	15.5089	27.5853	22.5312	18.3954	14.9939	17.3846	15.3333	16.6565	16.2132	16.8385	16.4496	16.2643	16.4031	21.4078	20.5621	21.7672	21.3137	20.2173	21.3137	26.875	24.7624	23.4257	32.5684	20.4013	20.4676	20.8841	23.7656	20.2623	21.3963	22.4708	21.6734
Th/Yb	1.7482	13.3059	1.77155	9.46189	5.40728	4.58591	23.9119	25.6312	45.72	30.9414	55.349	31.4984	47.1347	45.4524	49.9432	54.4025	57.1939	45.4524	57.1939	111.349	100.833	60.0433	46.0075	84.3503	57.5916	59.4118	57.7114	55.9783	58.9595	58.5492	57.5269	89.5165	62.7219	92.3913	93.1937	67.0255	93.1937	137.156	72.7778	126.19	126.201	105.917	103.416	104.908	86.3014	100	92.5532	92.6108	75.7732
Nb/Ta	6.27084	14.0365	13.0519	14.1697	9.97058	8.68664	14.7911	15.4557	14.745	13.7865	16.6266	16.5616	16.6898	16.4551	14.6513	14.1578	14.1784	13.8163	14.1784	17.1287	16.4545	15.157	15.3039	15.9639	16.0784	16.3158	15.4321	16.0274	15.4667	16.0784	15.4902	18.052	16.0563	18.8489	17.7698	18.4417	17.7698	16.8421	14.7881	12.1192	9.93939	18.1633	18.3401	18.5	17.9365	18.2192	17.9429	17.7457	18.7195
Ti/Eu	2280.88	2397.63	6107.47	7583.38	5766.92	5696.23	5731.87	6165.81	4150.15	5910.12	2949.3	5318.5	2344.46	2261.05	2127.15	2320.48	1570.12	1624.86	1570.12	1124.06	1331.24	1098.92	1544.66	2864.87	1251.02	1418.77	1307.76	1418.02	1319.16	1274.73	1371.85	1759.13	1736.02	1869.19	1686.02	1623.89	1686.02	1409.51	2480.69	1610.31	1290.71	1467.7	1529.91	1537.18	1678.6	1557.14	1724.23	1692.14	2022.41
La/Yb	10.1138	21.2664	12.5242	17.859	11.6982	10.2502	15.5789	14.403	25.7741	18.548	31.7447	20.363	52.2669	59.8153	59.6591	64.7799	57.1429	59.8153	57.1429	68.186	53.5	61.645	49.1045	58.0226	75.39	77.06	67.66	70.65	74.57	72.54	69.35	51.9313	41.6486	52.2826	53.4031	53.3121	53.4031	47.7064	56.1111	53.6905	36.7249	73.7278	72.948	73.5583	47.5342	70.6742	51.8085	50.6404	50.8247
(La/Yb)N	7.25461	15.2544	8.98364	12.8103	8.39114	7.35249	11.1748	10.3313	18.4877	13.3045	14.6064	15.6064	37.491	42.9055	42.7934	46.4666	40.9885	42.9055	41.9885	42.9885	43.9885	44.2179	35.2226	41.6196	54.08	55.27	48.53	50.68	53.49	52.03	49.75	37.2503	29.8745	37.5023	38.3061	38.2407	38.3061	34.2198	40.2485	38.5122	26.3427	52.8849	52.3256	52.7633	34.0963	50.6945	37.1622	36.3243	36.4566
Sr-Nd isotope
Rb/Sr	0.0861097	0.233765	0.901911	1.23862	0.601265	0.431731	0.603601	0.678622	0.770925	1.32758	1.11767	1.36752	0.389423	0.397501	0.368126	0.350511	-	-	-	-	-	-	-	-	-	-	-	-	-	-	-	0.651196	0.572507	0.46869	0.56321	-	-	-	-	-	-	-	-	-	-	-	-	-	-
87Sr/86Sr	0.715814	0.716066	0.715947	0.716047	0.715648	0.715715	0.716775	0.716604	0.718994	0.717846	0.717545	0.718698	0.716364	0.716276	0.716197	0.716204	-	-	0.716369	-	-	-	-	-	0.716287	0.716267	0.716387	0.716234	0.716342	0.716342	0.716671	0.719594	0.718791	0.719139	0.7187	-	-	-	-	-	-	0.719001	-	0.718777	0.71909	0.718705	0.719828	0.718913	0.717691
2σ	1.04834e-05	1.01548e-05	8.44981e-06	9.35478e-06	8.76288e-06	1.15701e-05	1.08236e-05	9.82513e-06	9.72532e-06	8.1803e-06	9.20351e-06	7.92425e-06	8.34093e-06	8.6651e-06	5e-06	6e-06	-	-	-	-	-	-	-	-	-	-	-	-	-	-	-	8.33924e-06	5e-06	6e-06	6e-06	-	-	-	-	-	-	-	-	-	-	-	-	-	-
Nd	35.2479	50.2088	16.7762	16.6984	14.5856	11.9418	6.53609	7.42076	12.0762	8.48723	20.9932	11.9894	114.42	80.9027	7.3	46.7264	-	-	-	-	-	-	-	-	-	-	-	-	-	-	-	154.356	130.777	184.328	184.321	-	-	-	-	-	-	-	-	-	-	-	-	-	-
Sm	7.57448	10.4143	4.11908	4.23143	3.21489	2.95011	1.51046	1.56142	2.70079	1.88908	4.42718	2.70149	19.6472	14.9744	1.7	9.12448	-	-	-	-	-	-	-	-	-	-	-	-	-	-	-	29.7211	20.1448	20.4839	20.7575	-	-	-	-	-	-	-	-	-	-	-	-	-	-
Sm/Nd	0.214892	0.20742	0.245531	0.253404	0.220415	0.247041	0.231096	0.210413	0.223646	0.222579	0.210887	0.225323	0.171711	0.185092	0.232877	0.195274	-	-	-	-	-	-	-	-	-	-	-	-	-	-	-	0.192549	0.15404	0.111127	0.112616	-	-	-	-	-	-	-	-	-	-	-	-	-	-
143Nd/144Nd	0.511862	0.511903	0.511939	0.51199	0.511971	0.512006	0.511906	0.511913	0.511876	0.511876	0.511868	0.511874	0.511944	0.511947	0.51195	0.511966	-	-	0.51117	-	-	-	-	-	-	-	-	-	-	-	-	0.511848	0.511887	0.511899	0.511886	-	-	-	-	-	-	0.511876	-	0.51189	0.511876	0.511887	0.511867	0.511872	0.511911
2σ	1.00829e-05	7.52202e-06	7.80494e-06	7.39405e-06	6.93773e-06	8.256e-06	1.01315e-05	9.47284e-06	8.49638e-06	8.92796e-06	7.01915e-06	6.87912e-06	6.82157e-06	6.98976e-06	1e-05	9e-06	-	-	-	-	-	-	-	-	-	-	-	-	-	-	-	7.14702e-06	9e-06	1.2e-05	1.1e-05	-	-	-	-	-	-	-	-	-	-	-	-	-	-
Cs/Th	0.34604	0.129861	9.74628	2.22201	0.35877	0.391876	0.116196	0.11488	0.265581	0.42029	0.246695	0.509903	0.111353	0.148642	0.108077	0.105202			0.258252	1.45489	0.217521											0.133257	0.32845	0.124118	0.103933	0.124964						0.0813966	0.0930636	0.120526	0.0565608	0.0339326	0.101839	0.131649	0.0982993
[truncated: 3 more columns]
